# Supplementary material for: Integrated QSAR Models for Prediction of Serotonergic Activity: Machine Learning Unveiling Activity and Selectivity Patterns of Molecular Descriptors
Source: MDPI journal article supplement (doi:10.3390/pharmaceutics16030349), 2024-03-01

# AATS7v

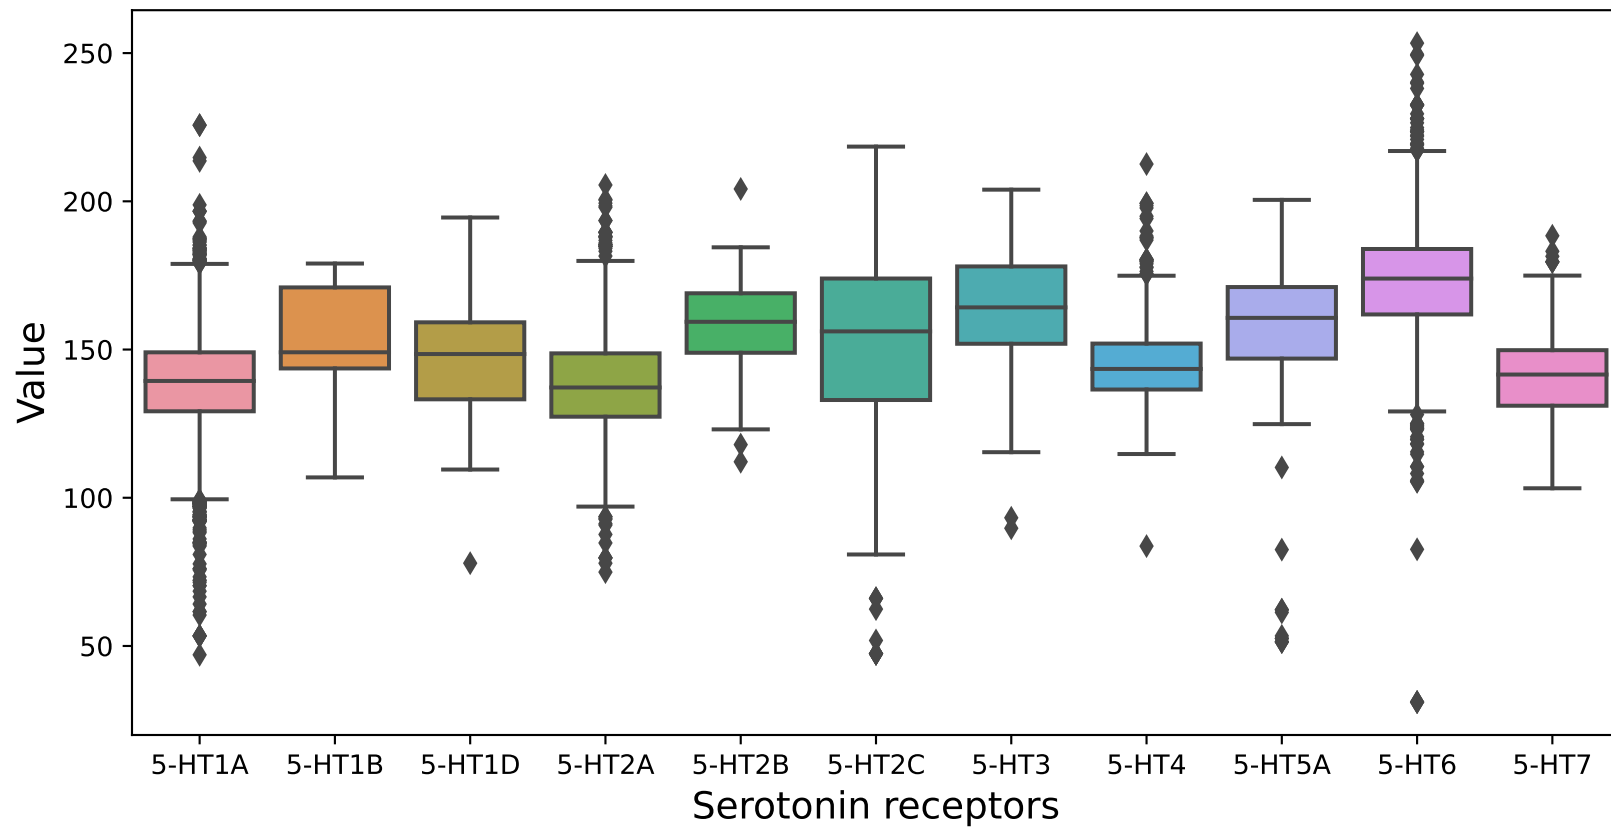

# AATSC1v

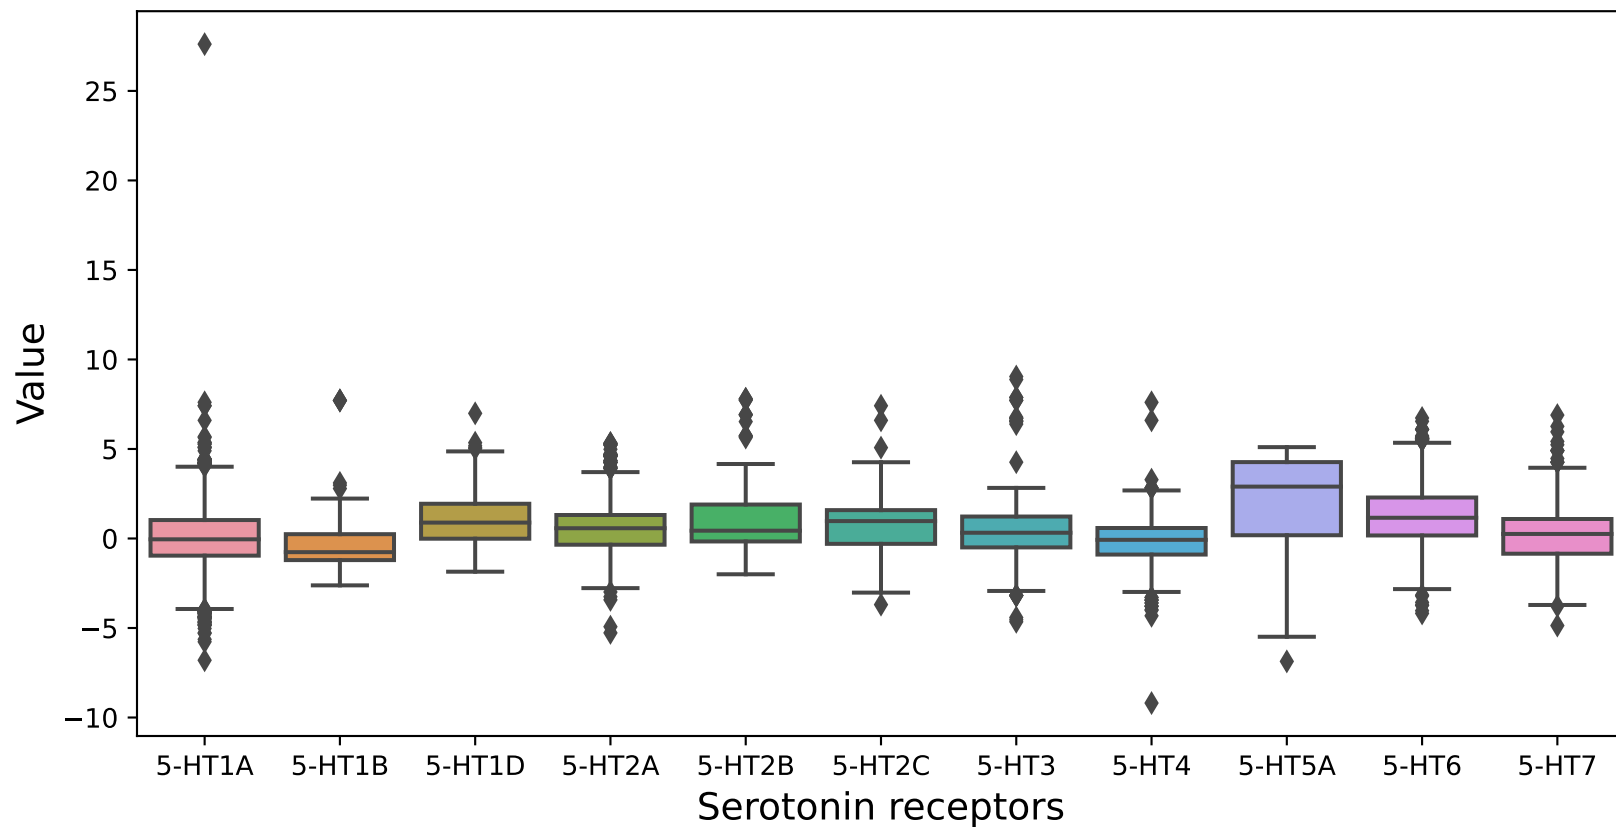

AATSC7dv

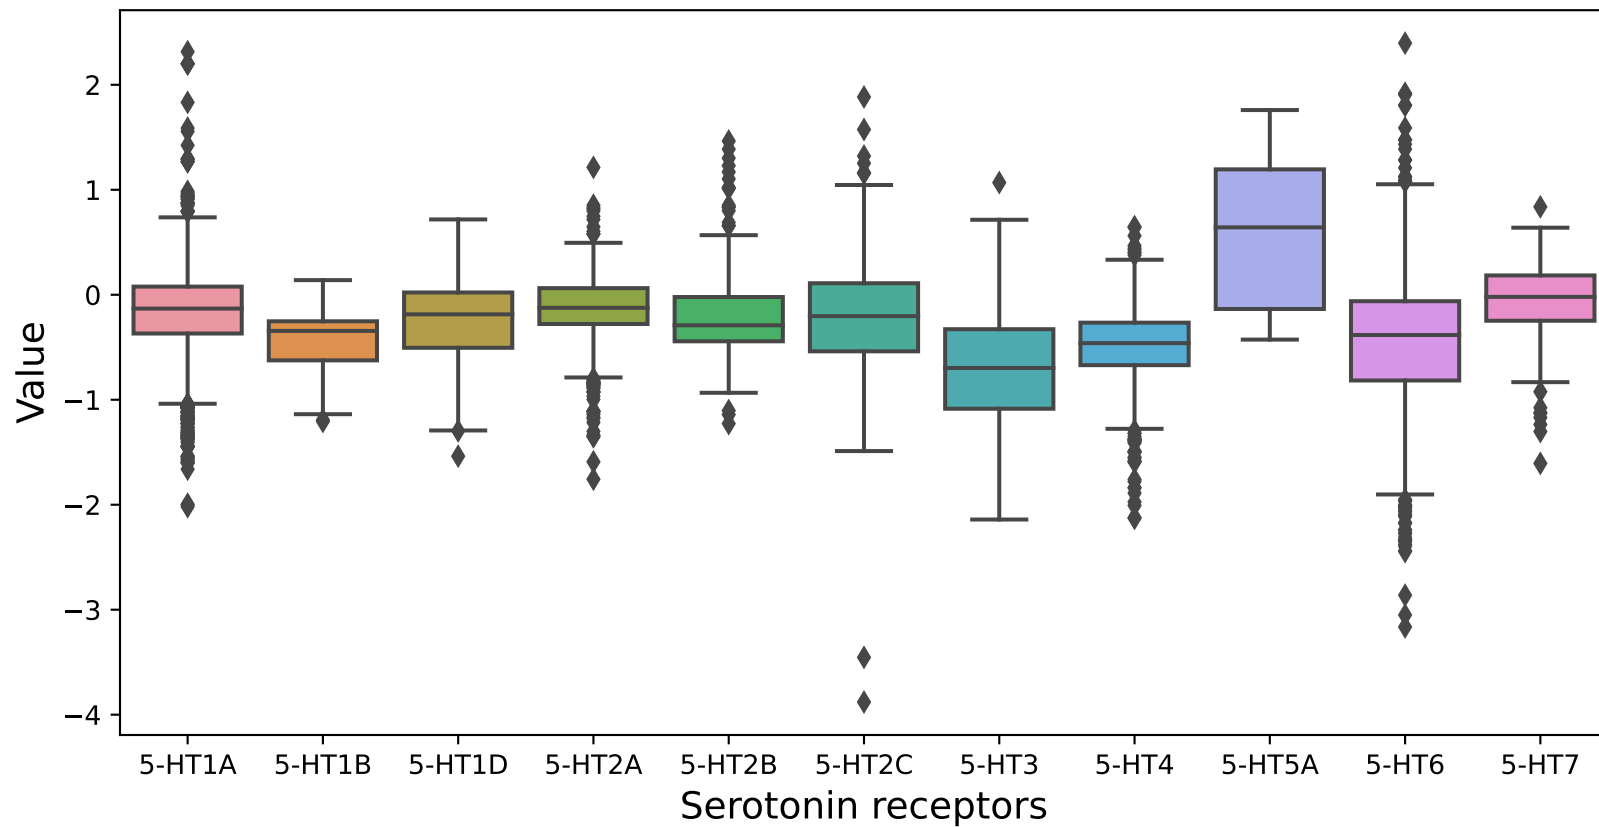

# ATS0v

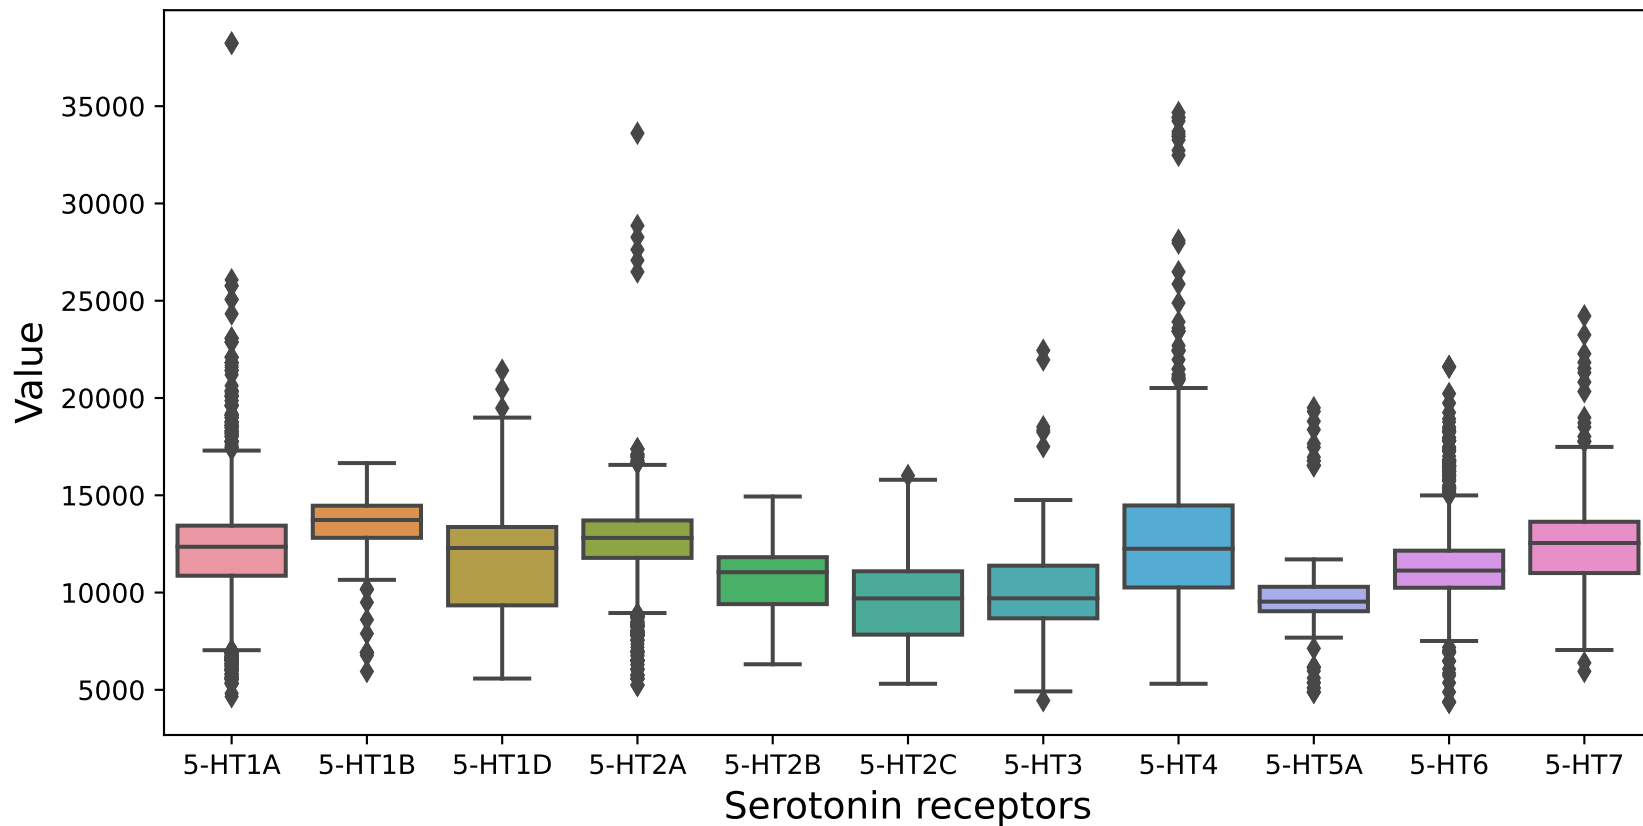

# ATS1d

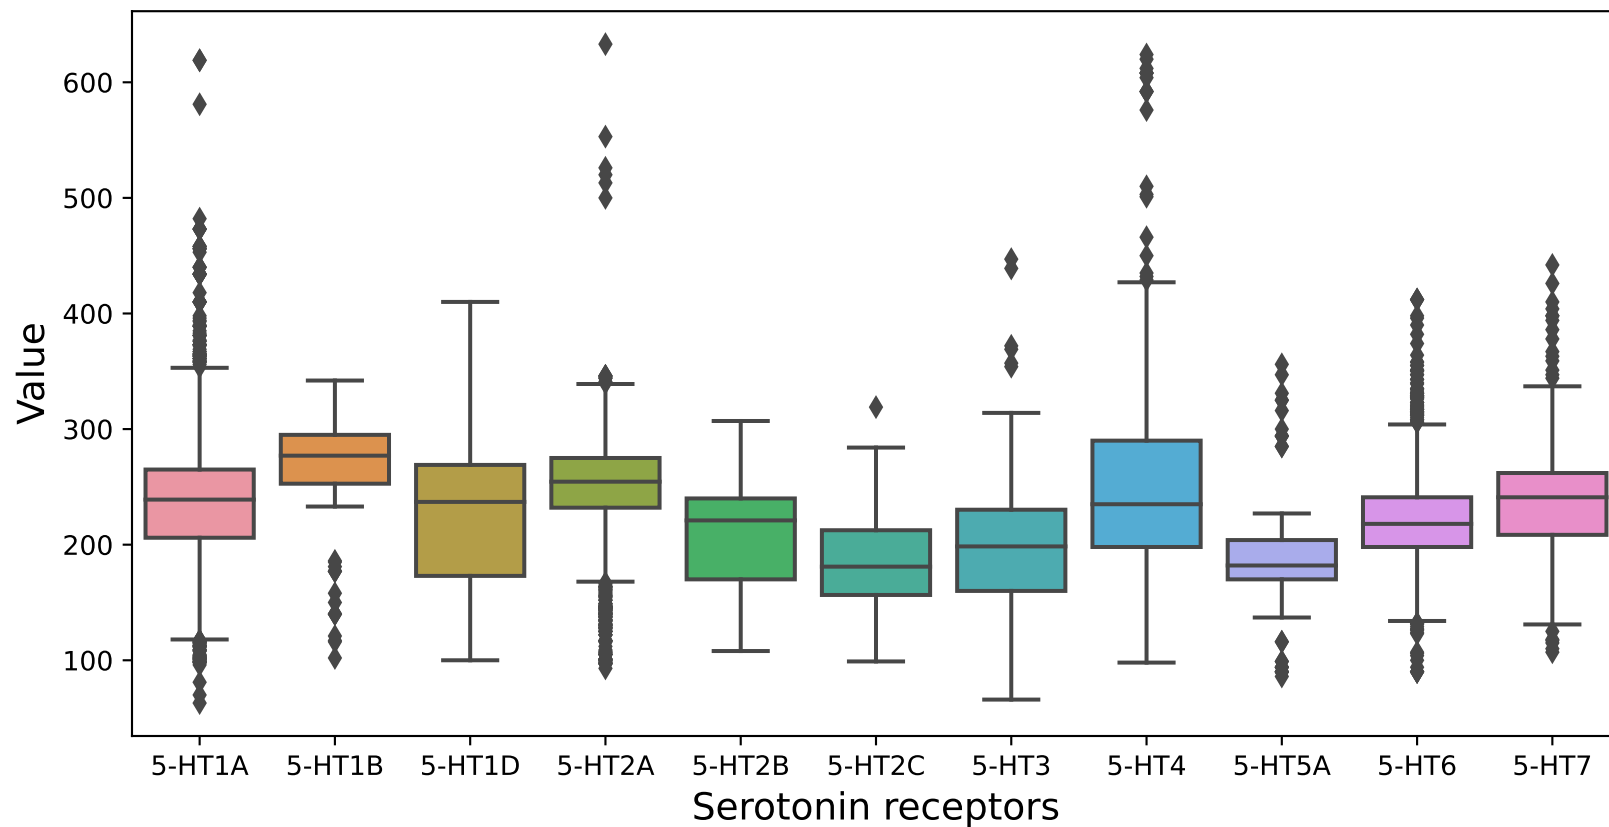

# ATS1p

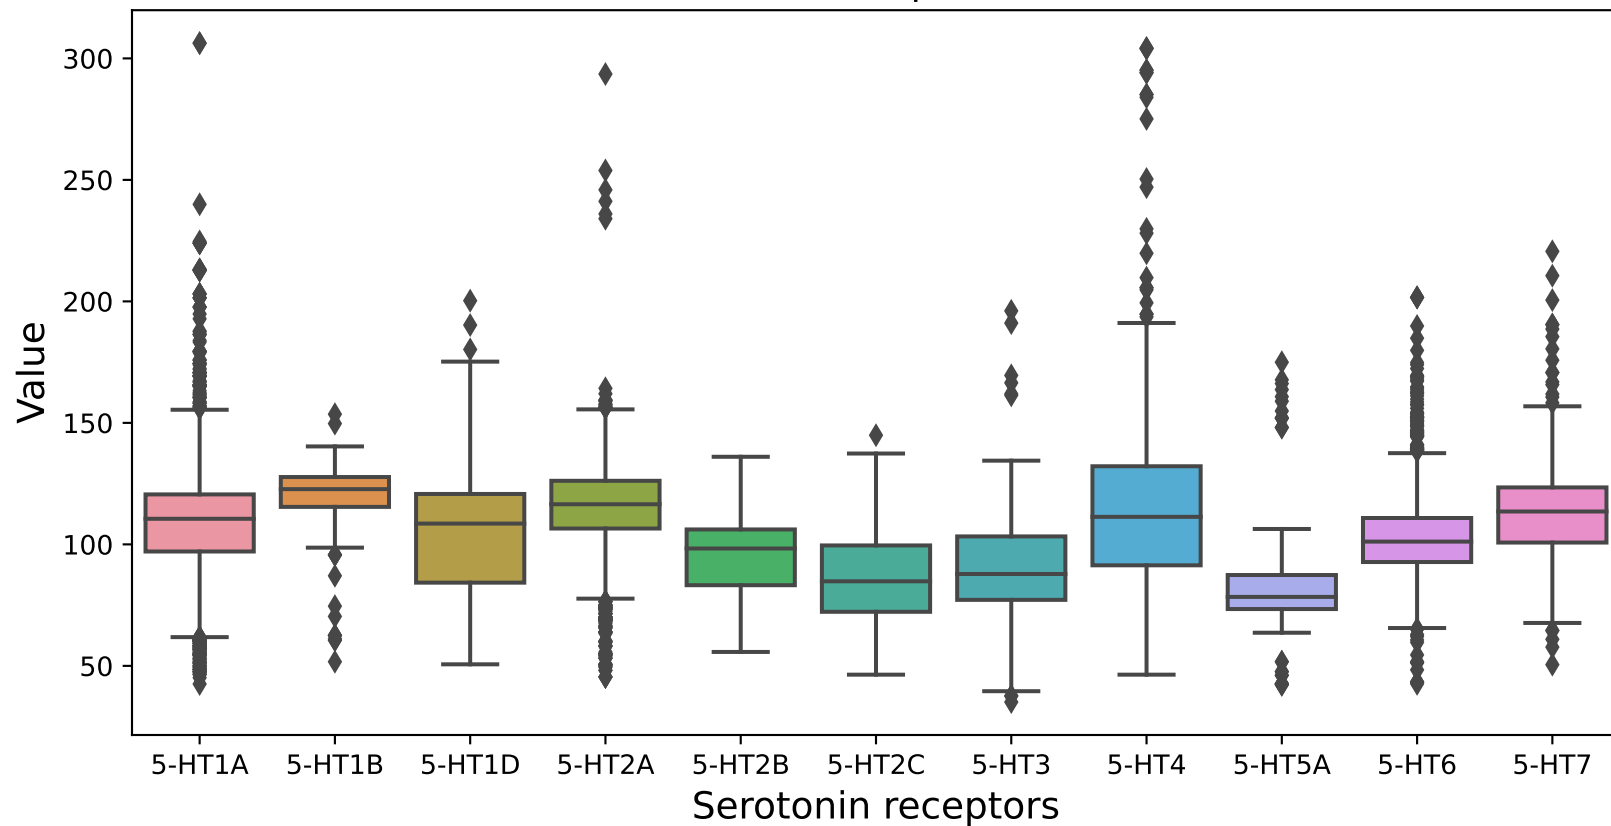

# ATS2d

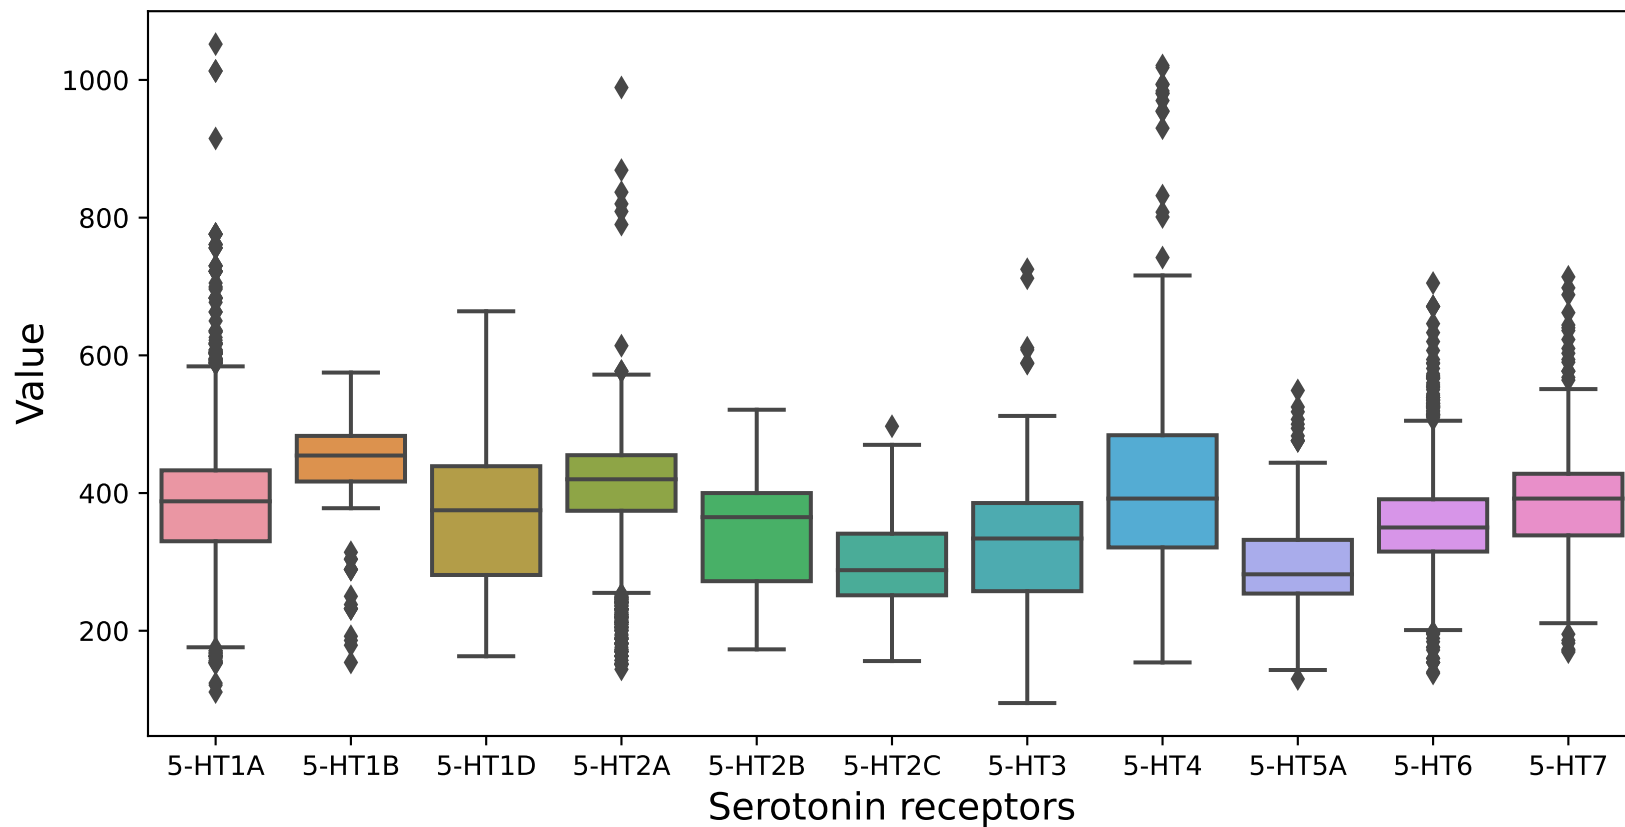

# ATS2v

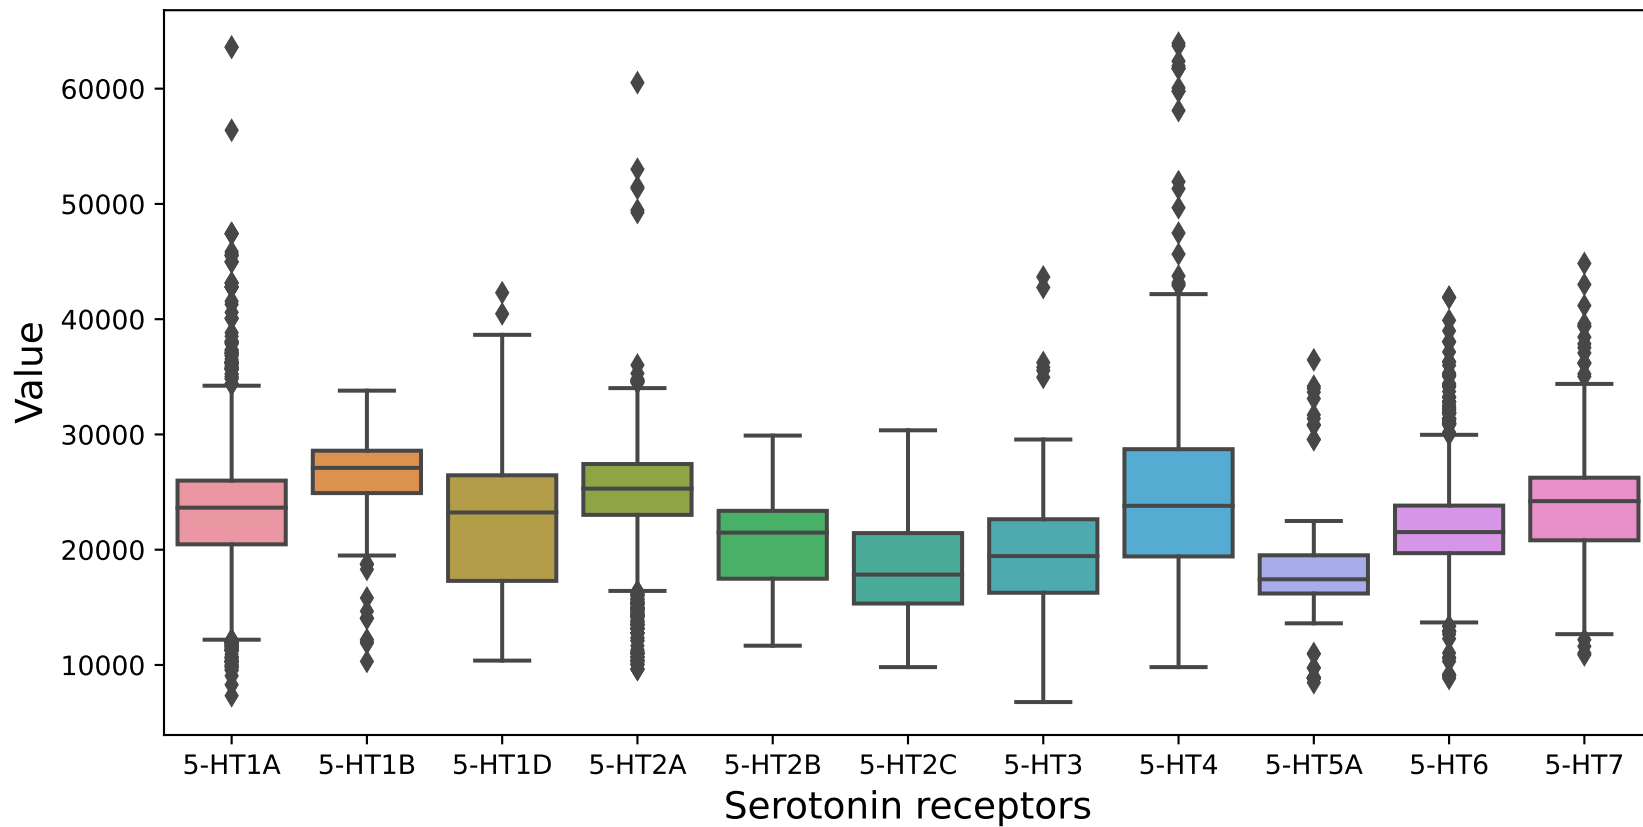



## ATS2Z

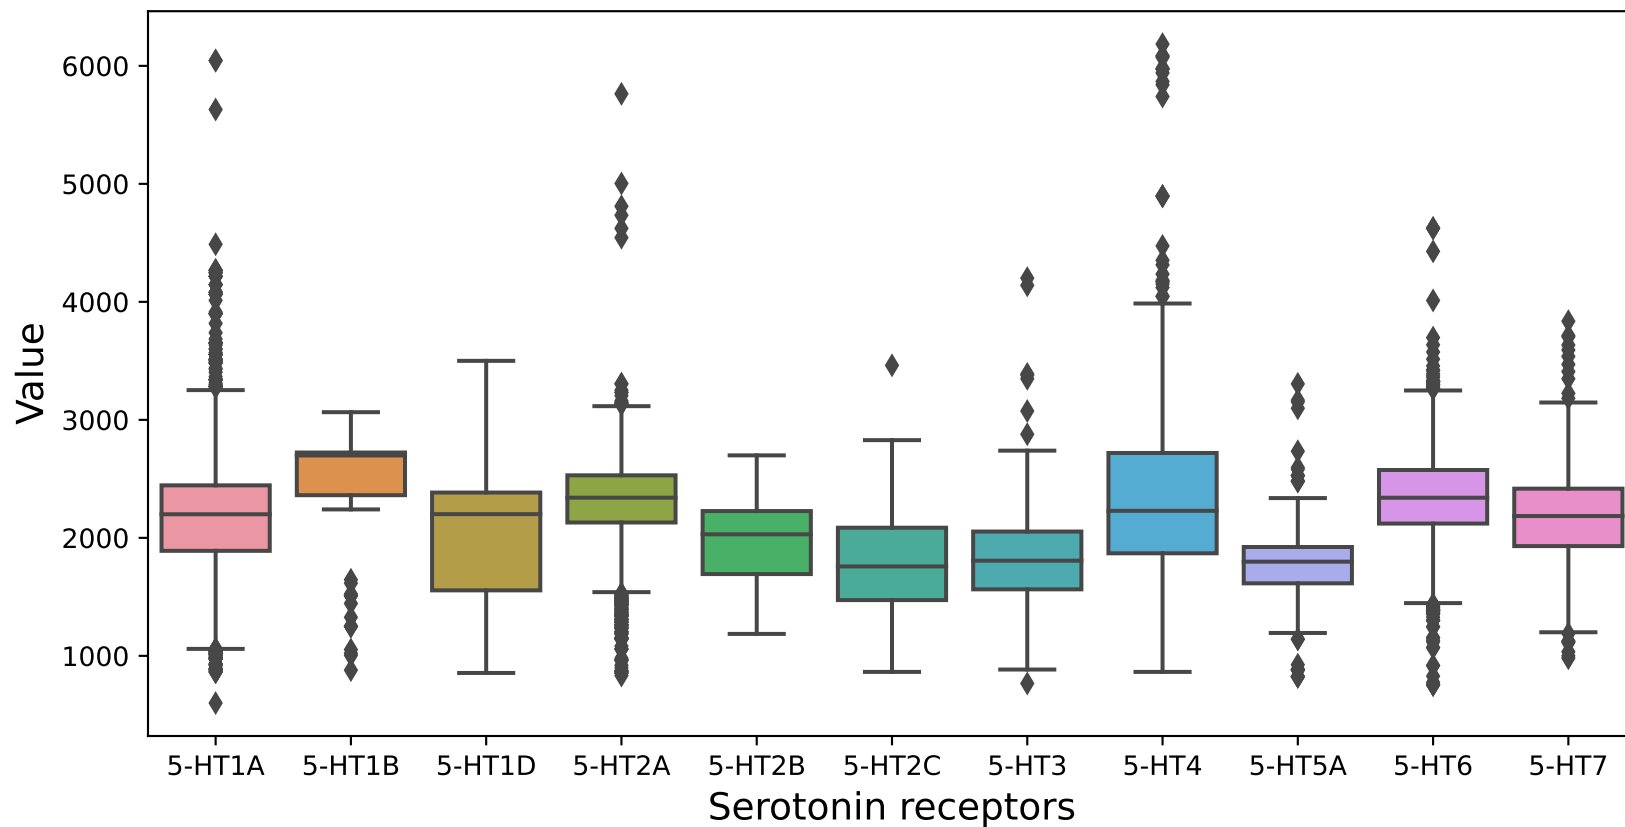

# ATS3d

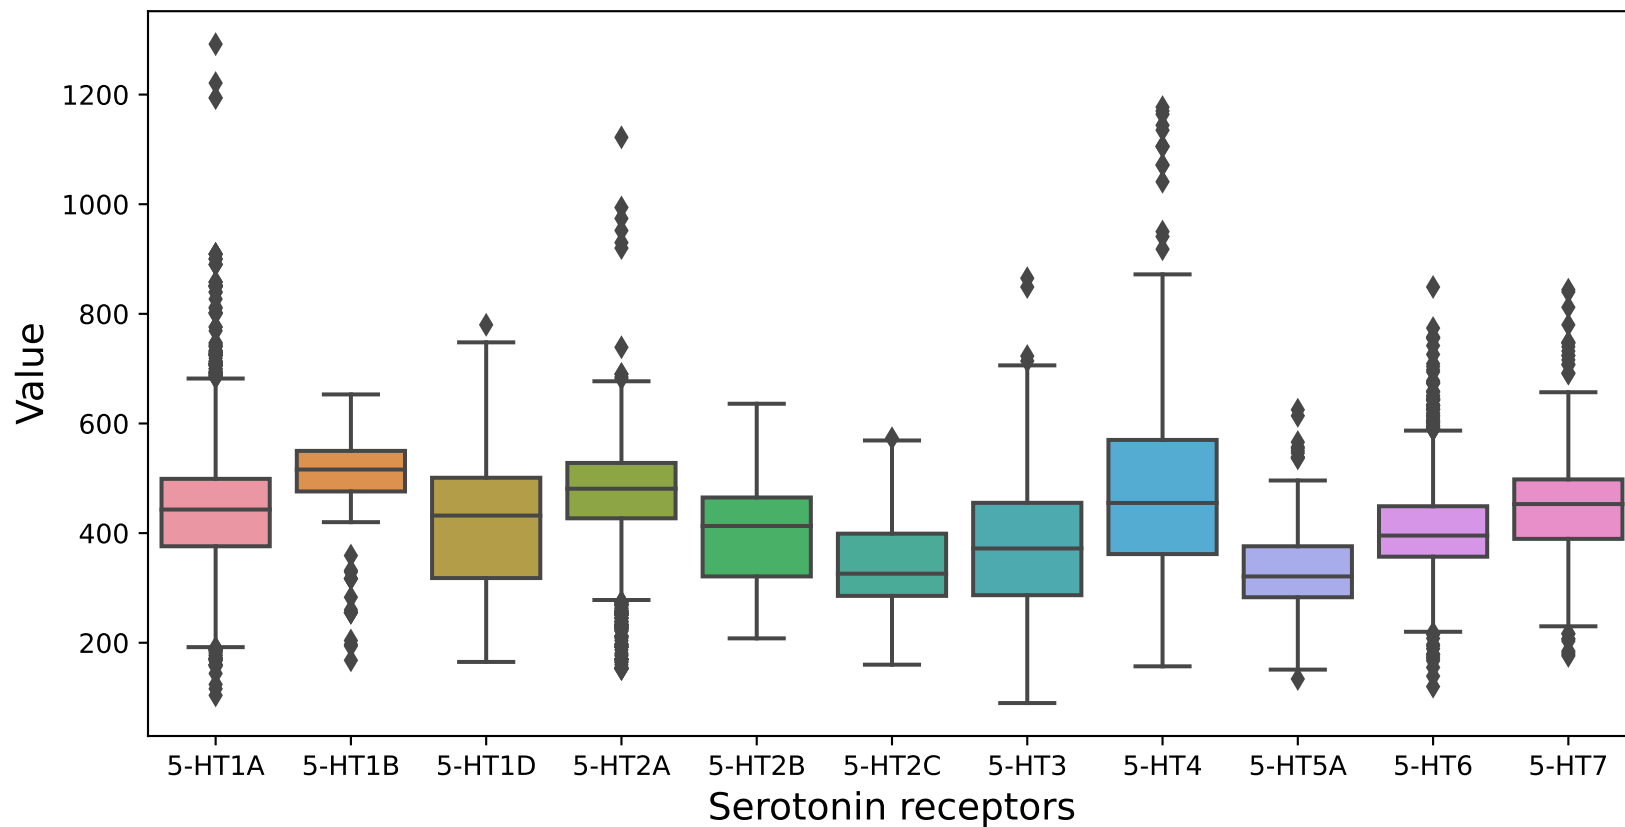

# ATS3p

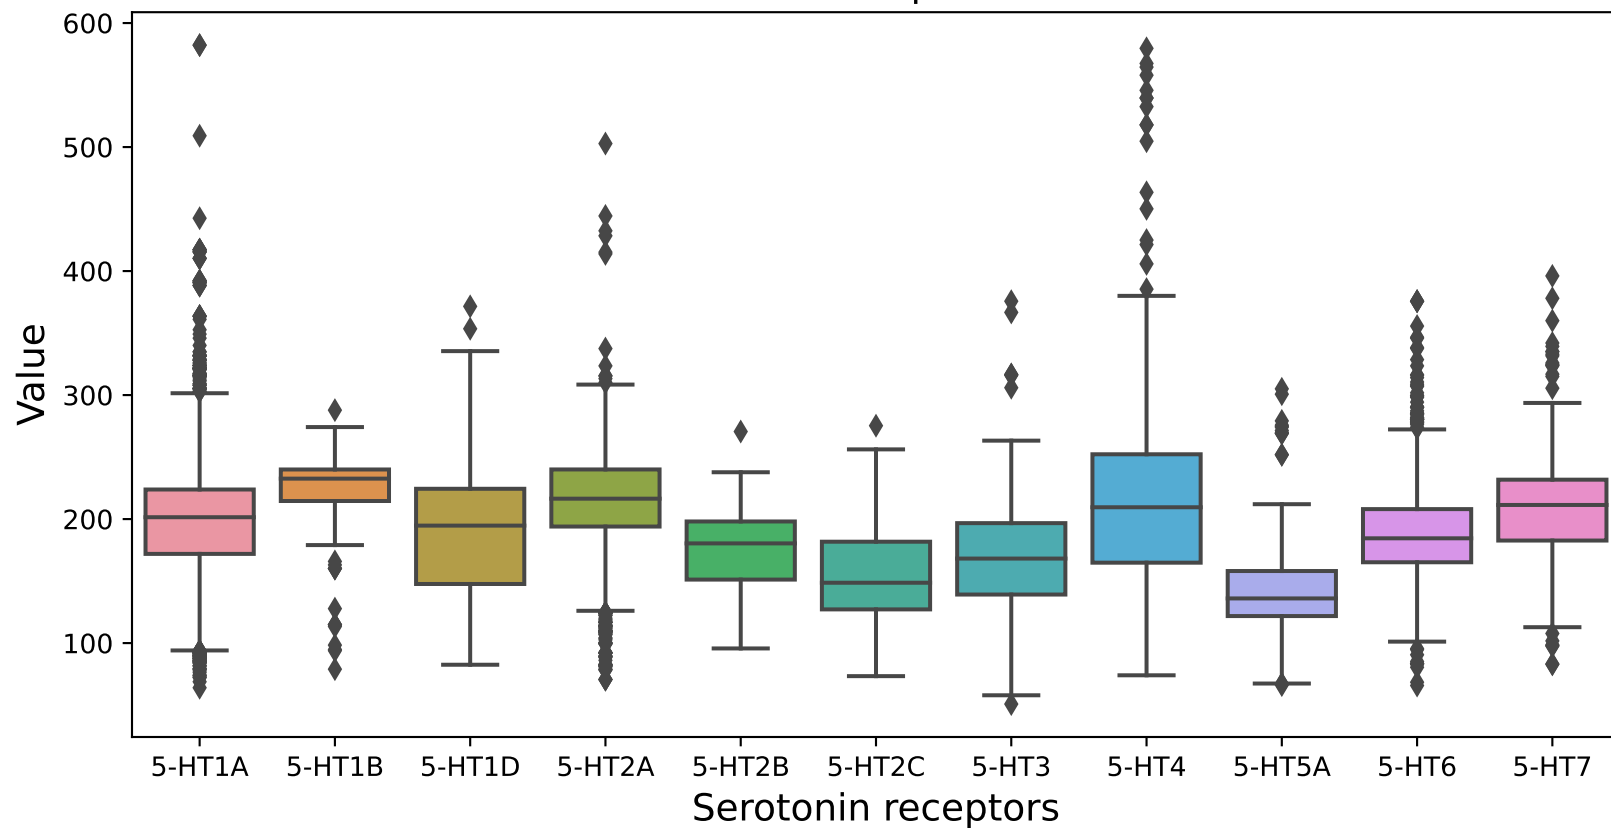

# ATS3v

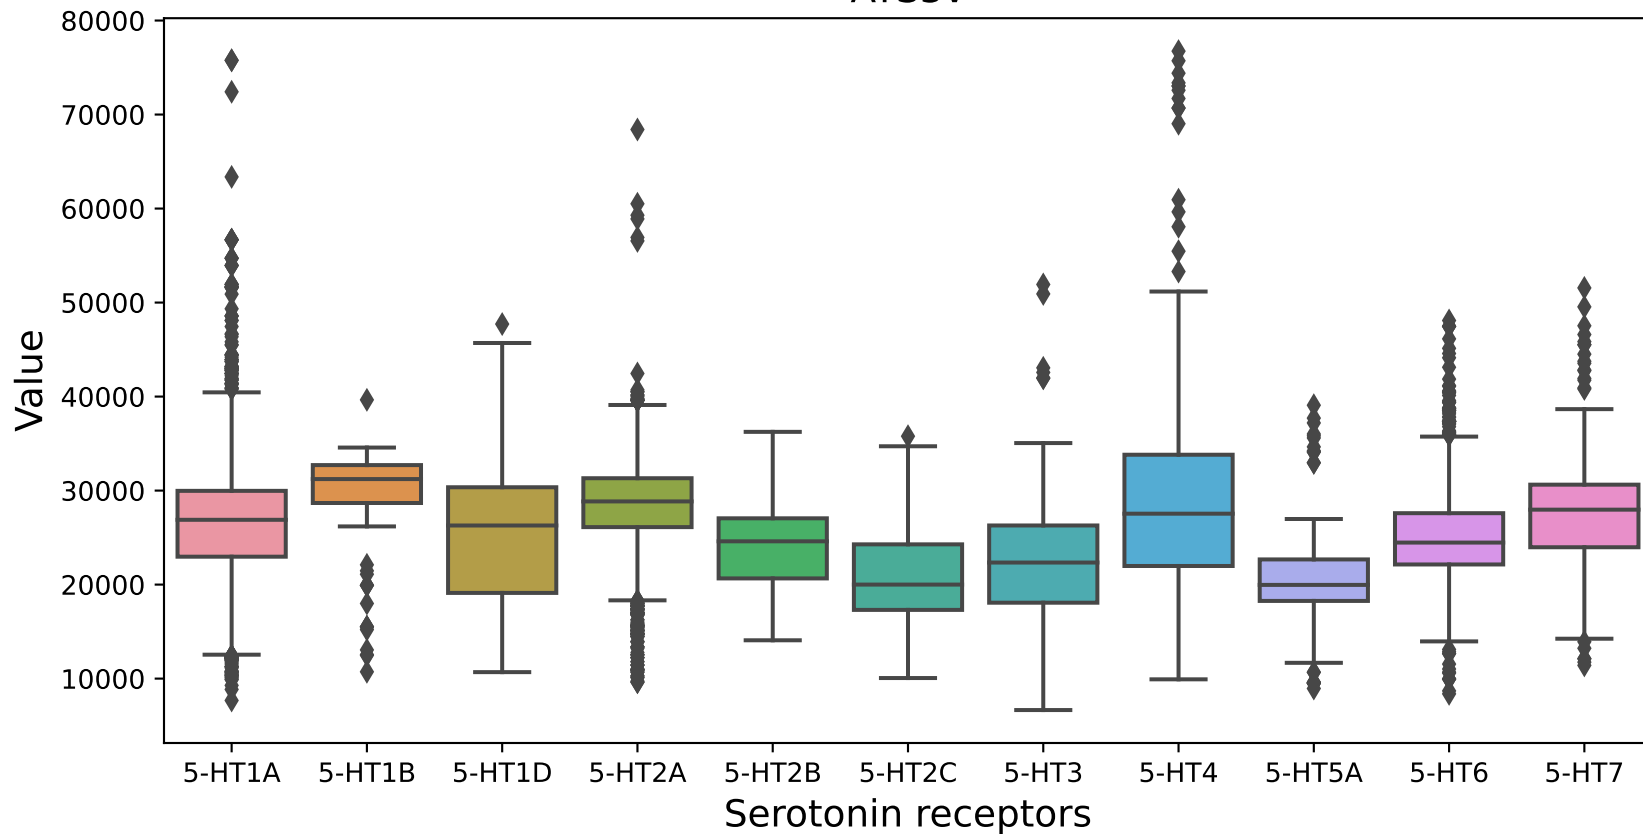

ATS4m

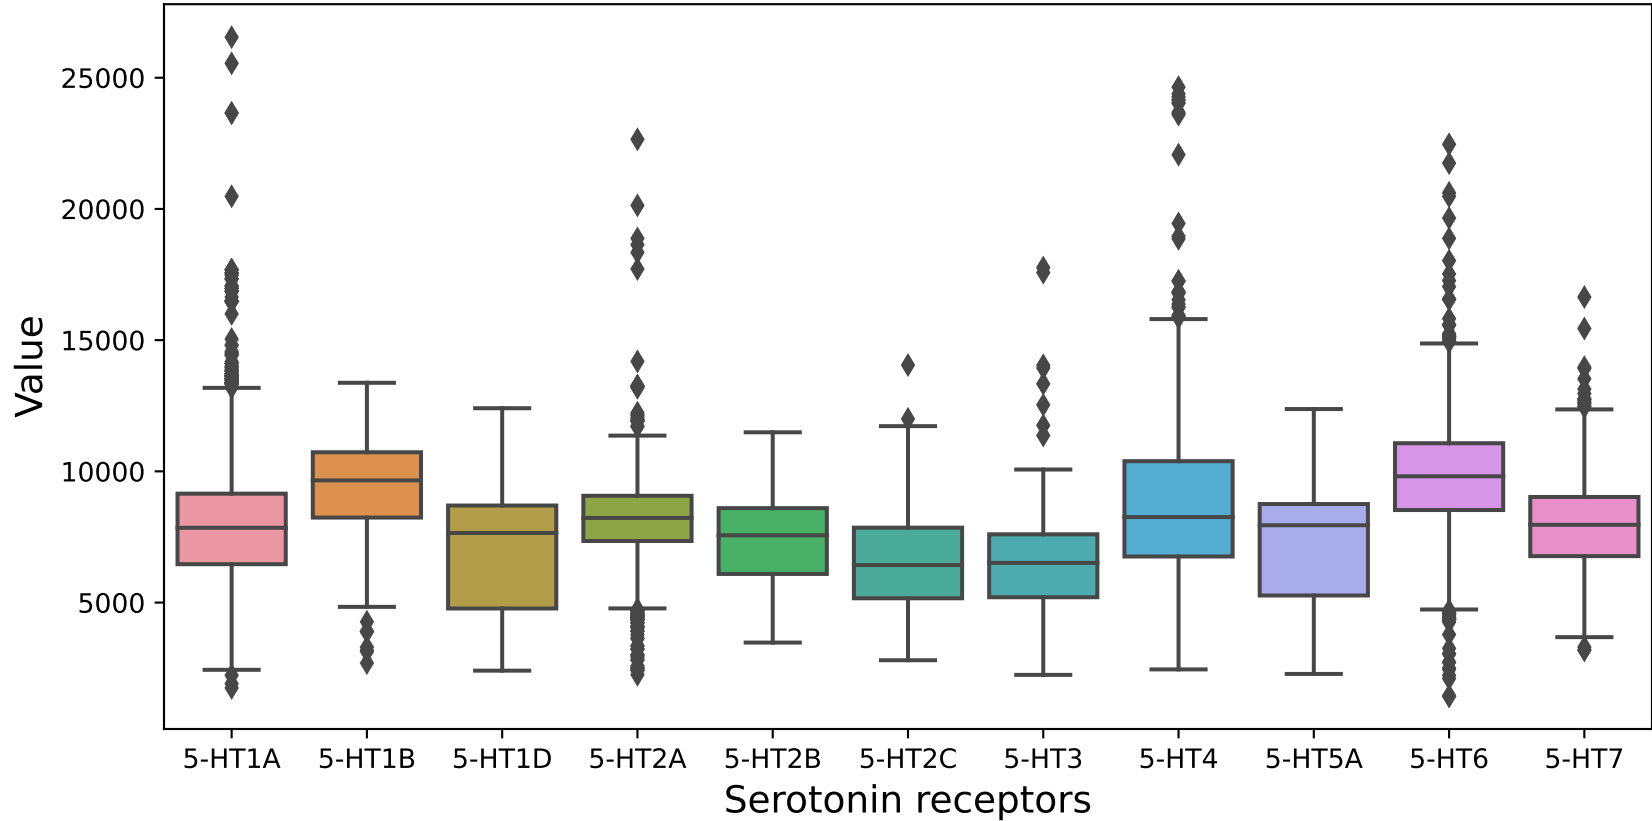

# ATS4p

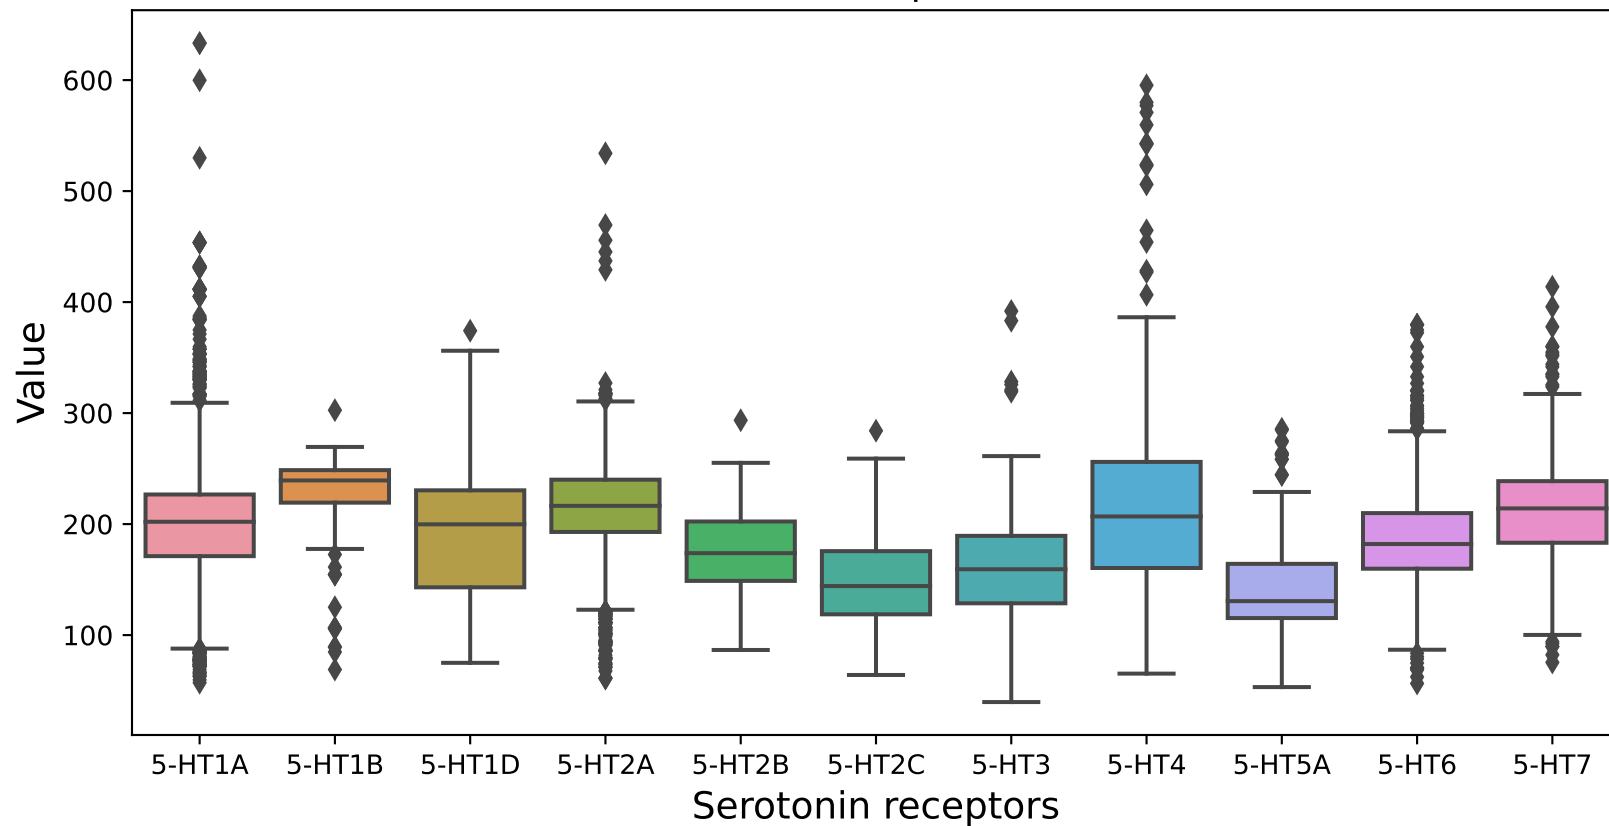

# ATS4Z

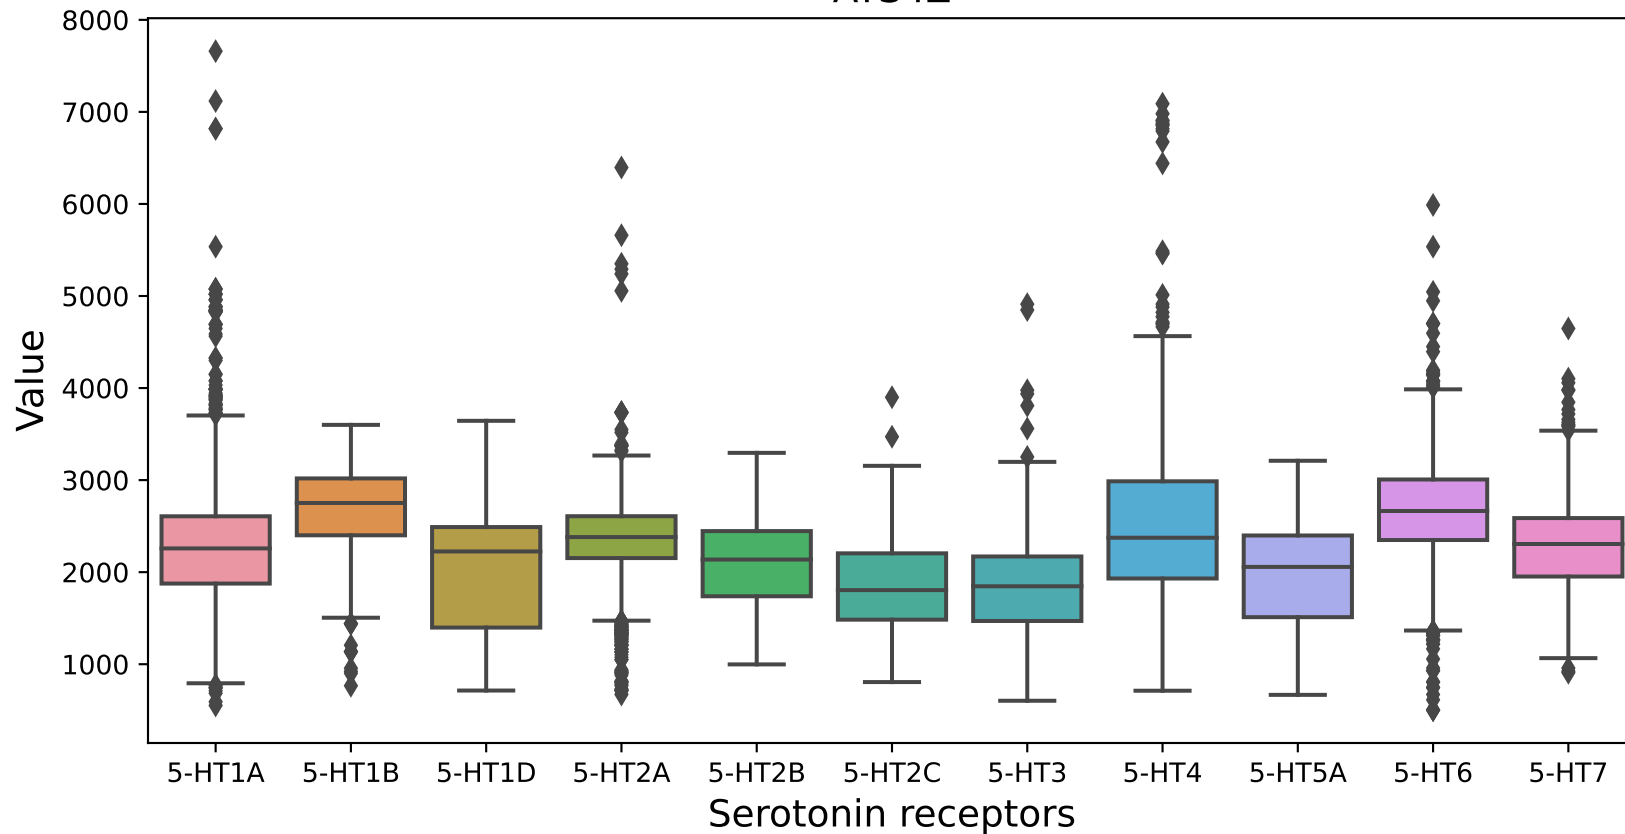

# ATS5Z

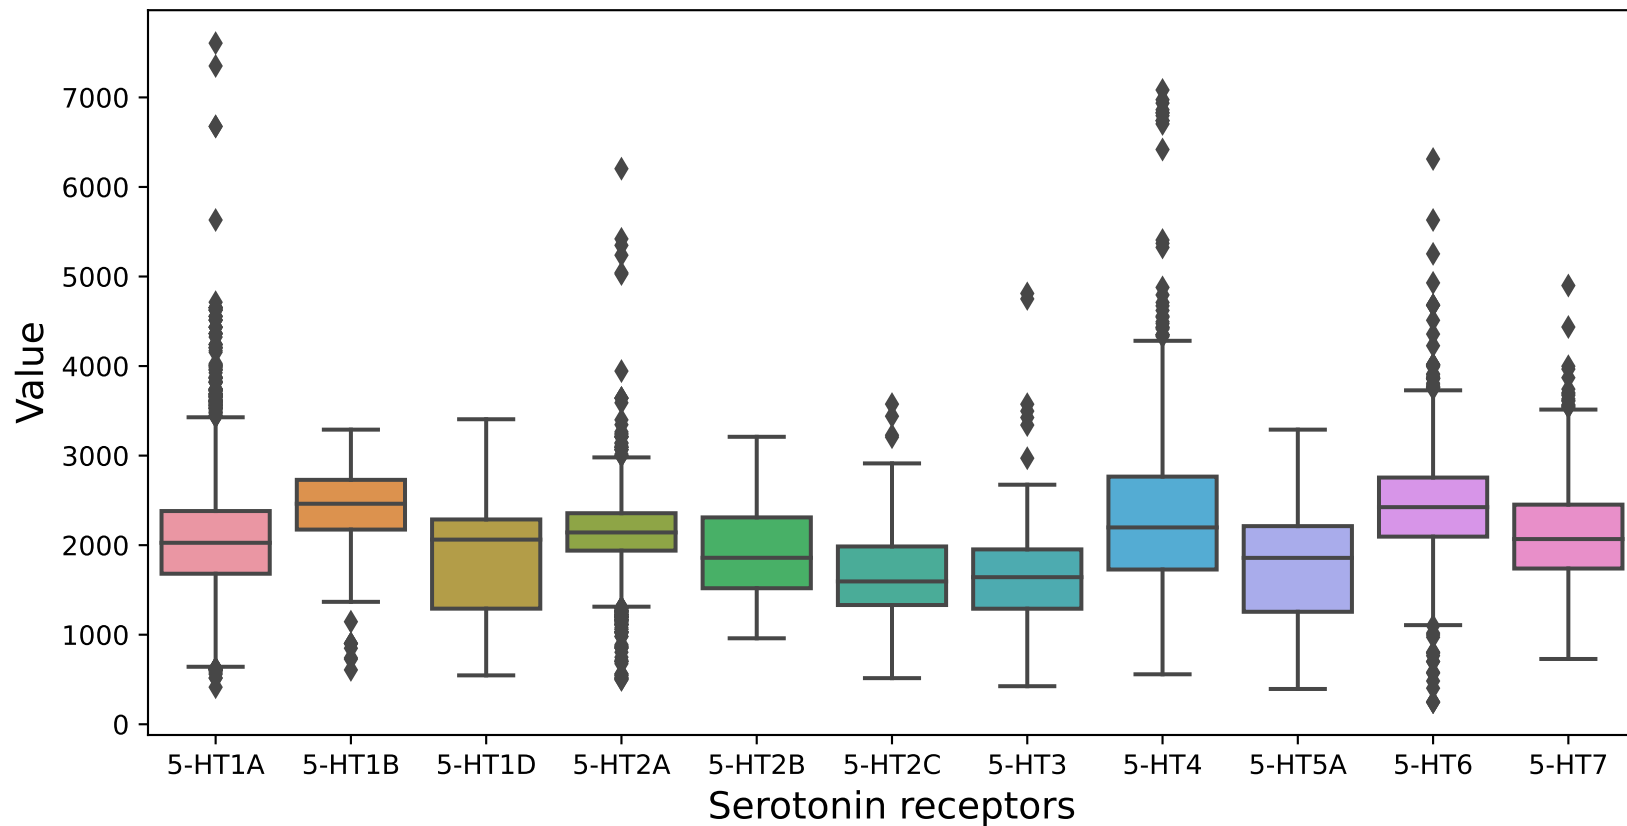



# ATSC1i

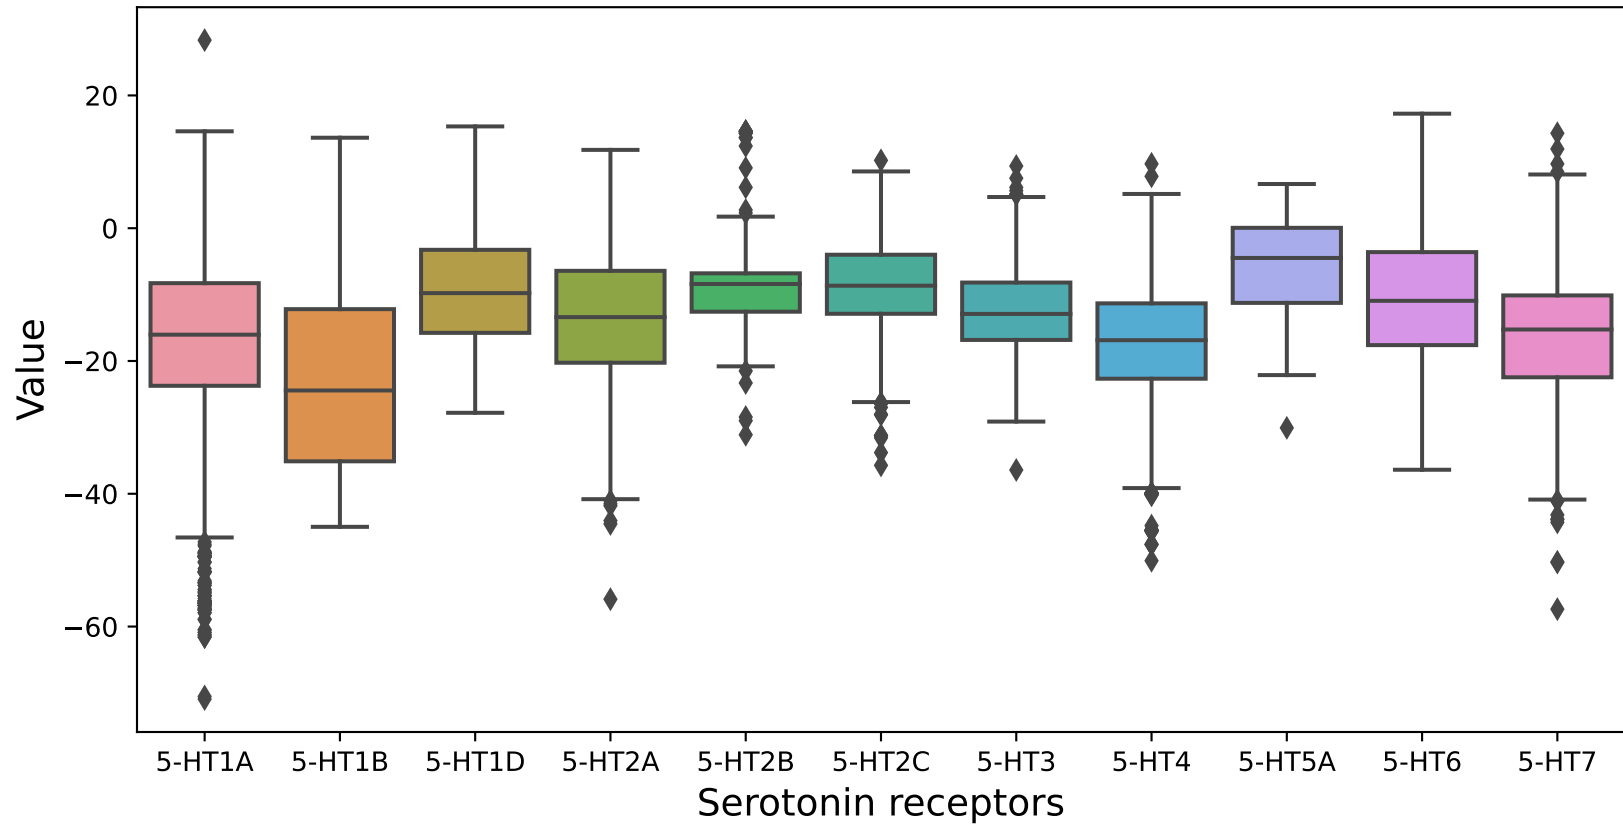

ATSC1m

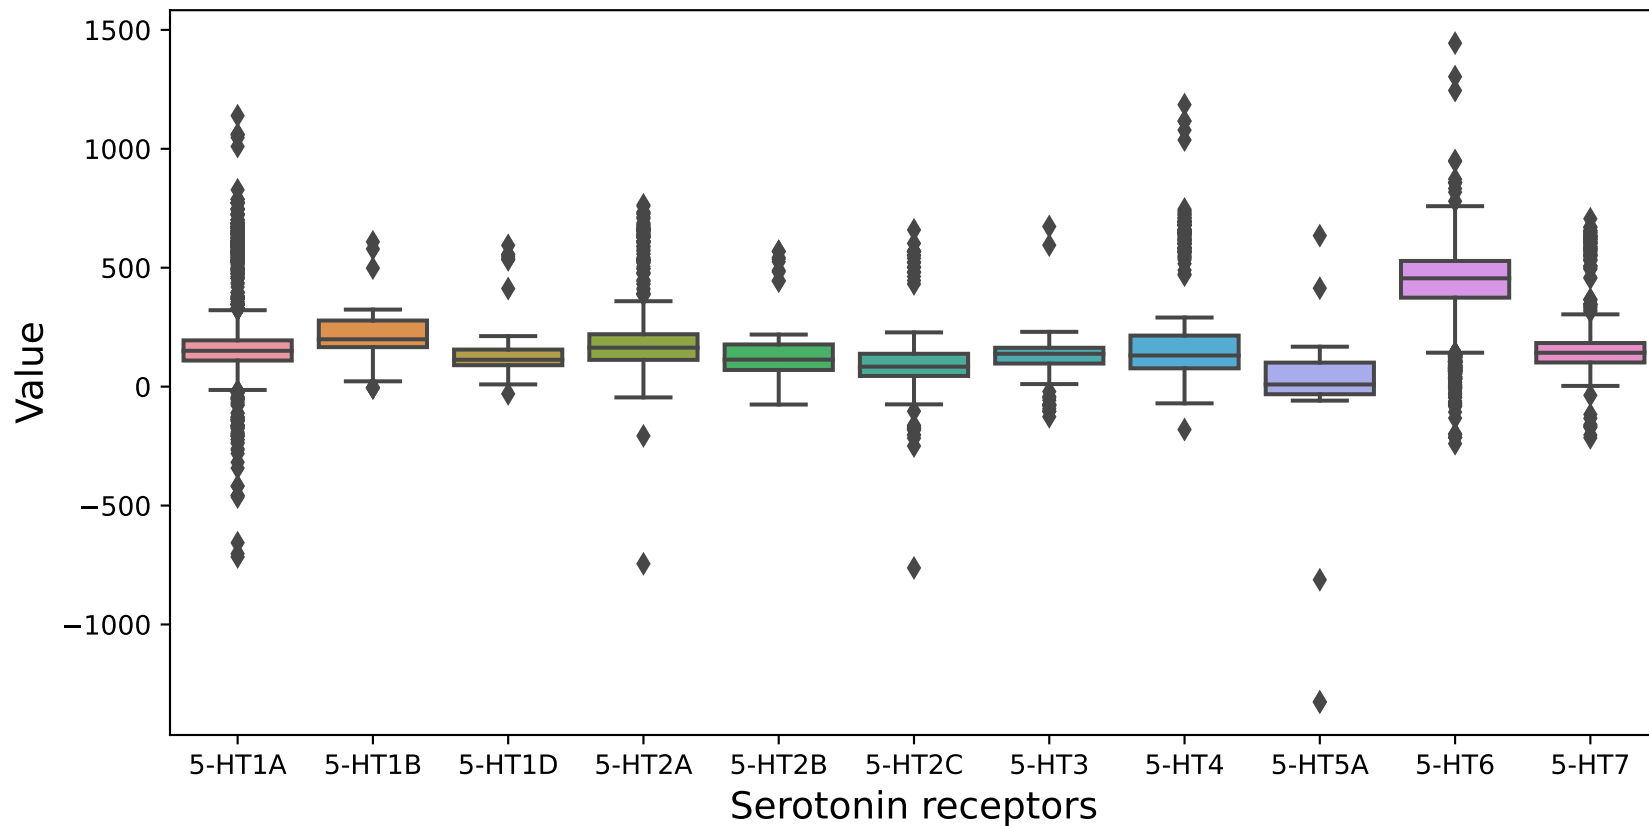

ATSC1v

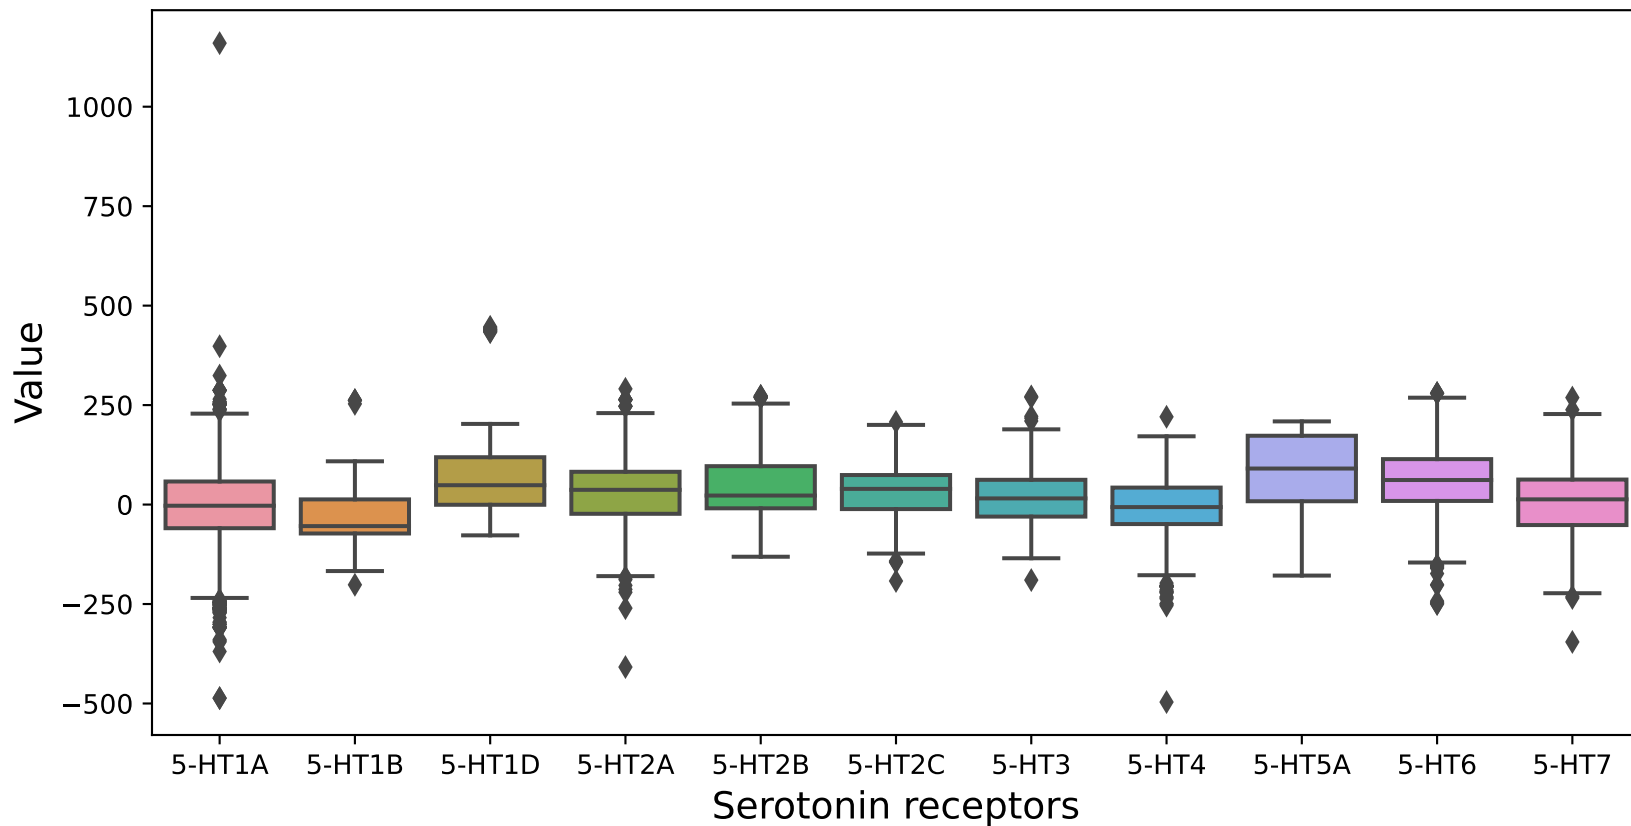

# ATSC1Z

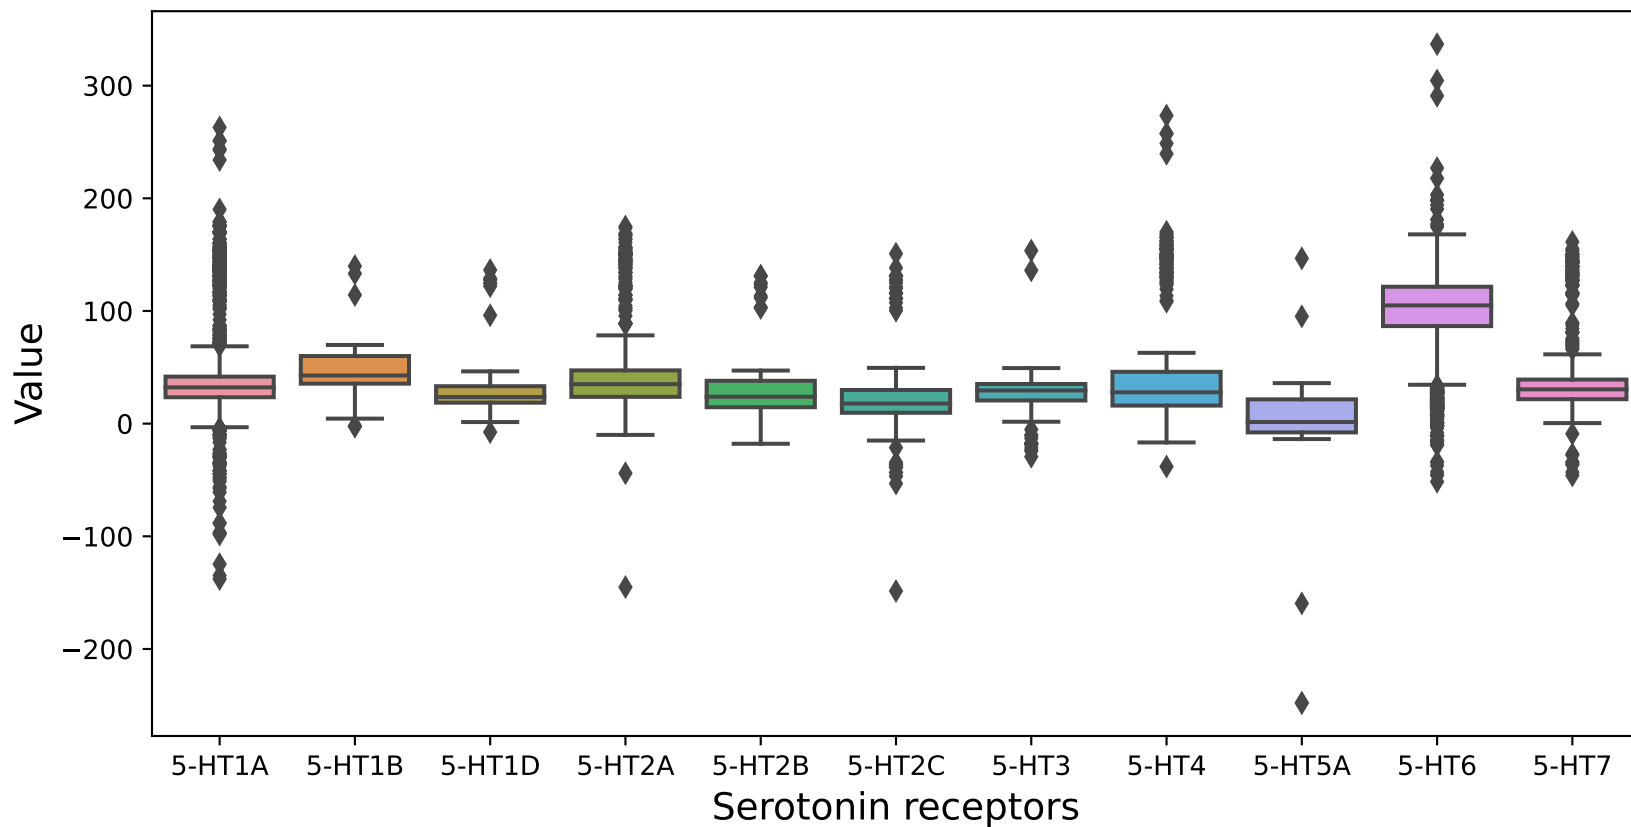

ATSC7v

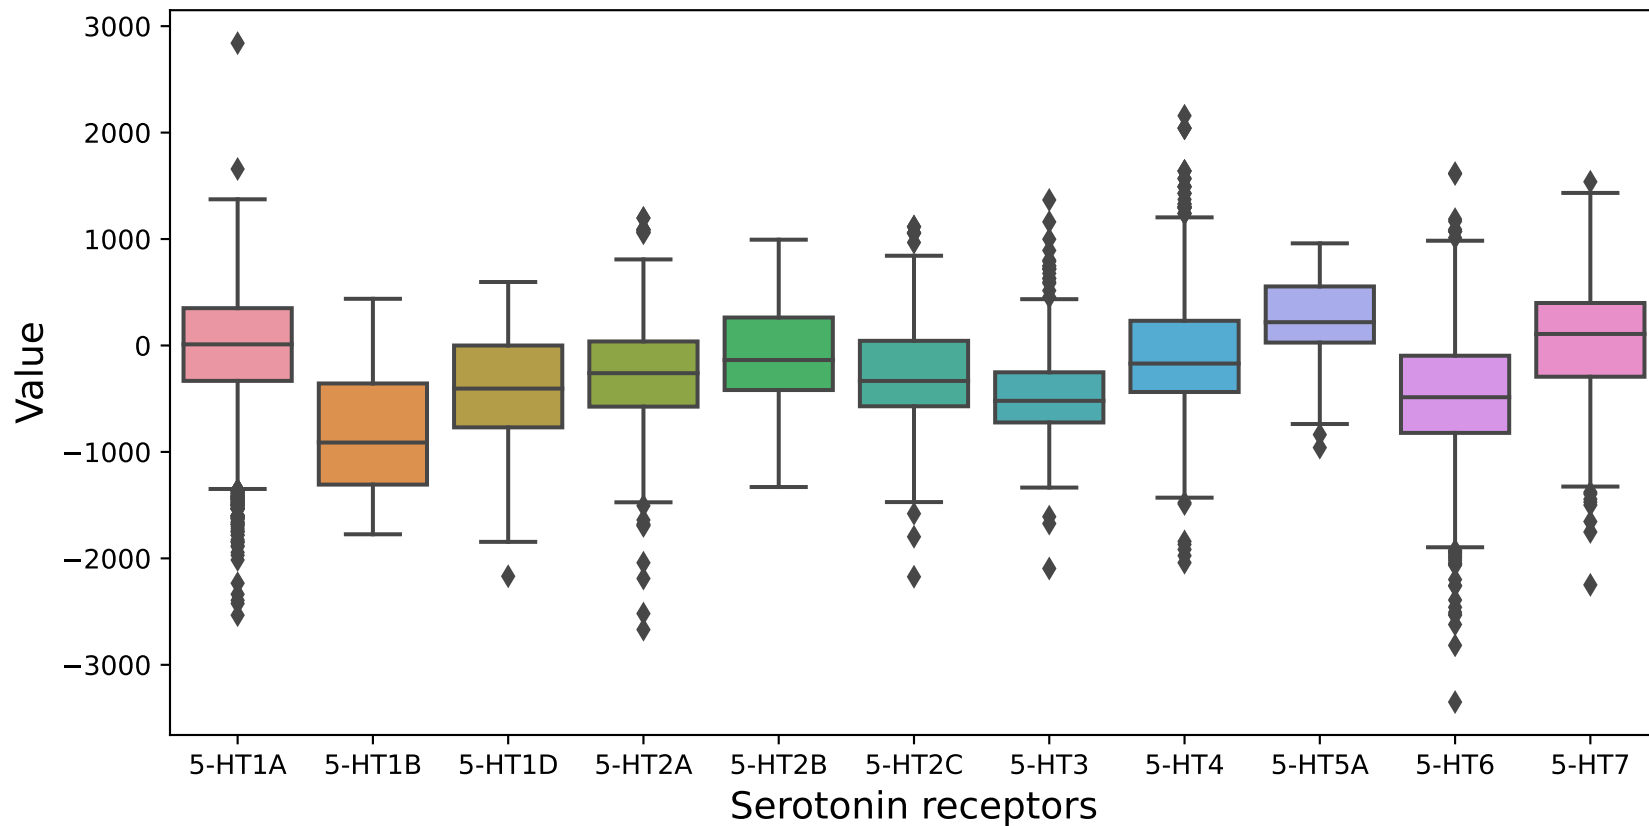

# AXp-6dv

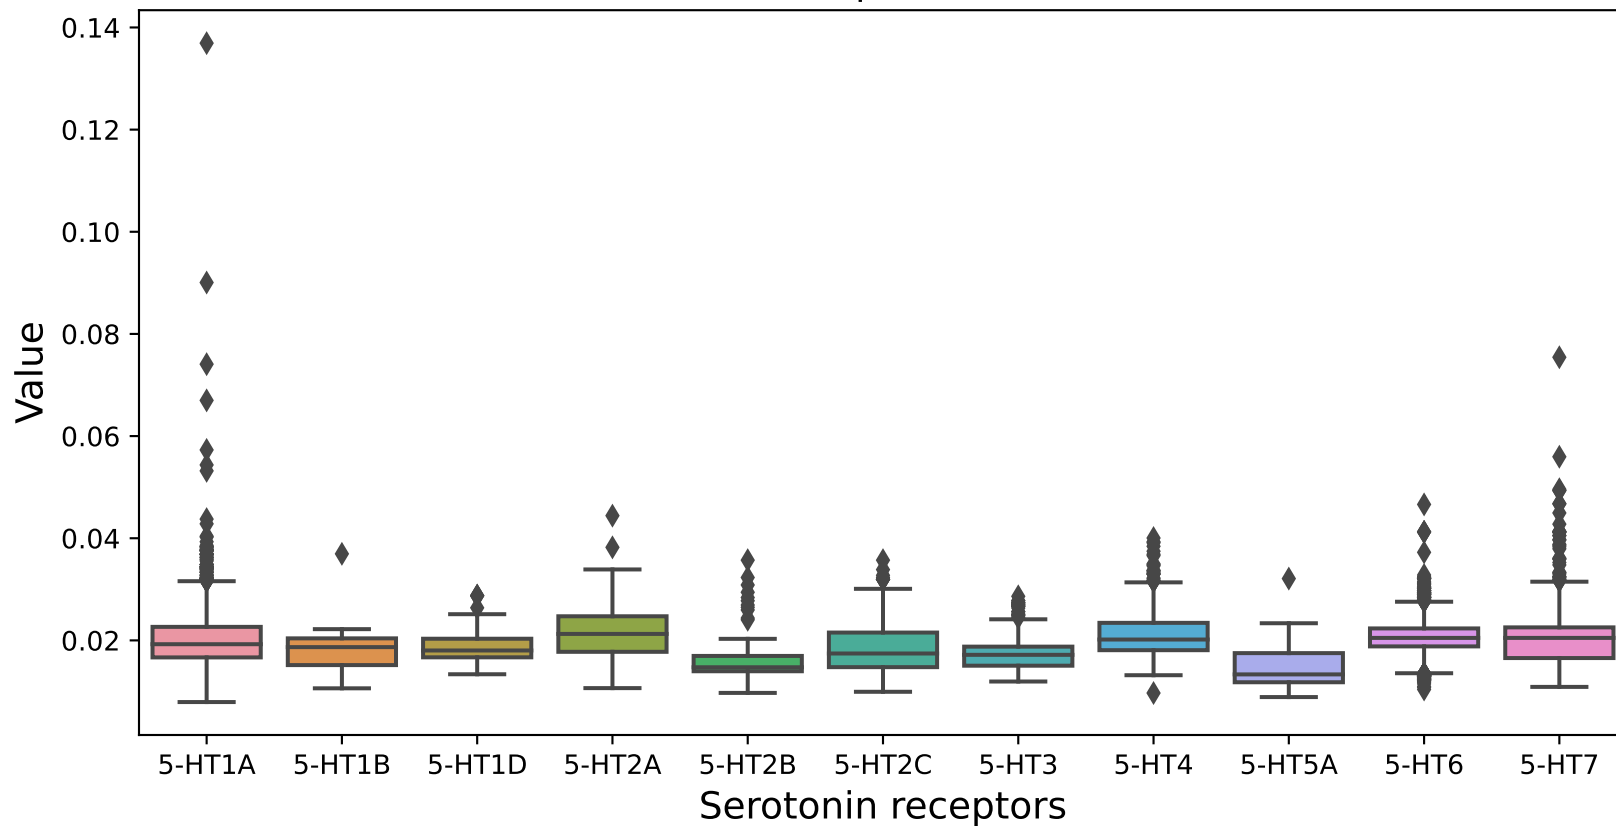

# EState\_VSA4

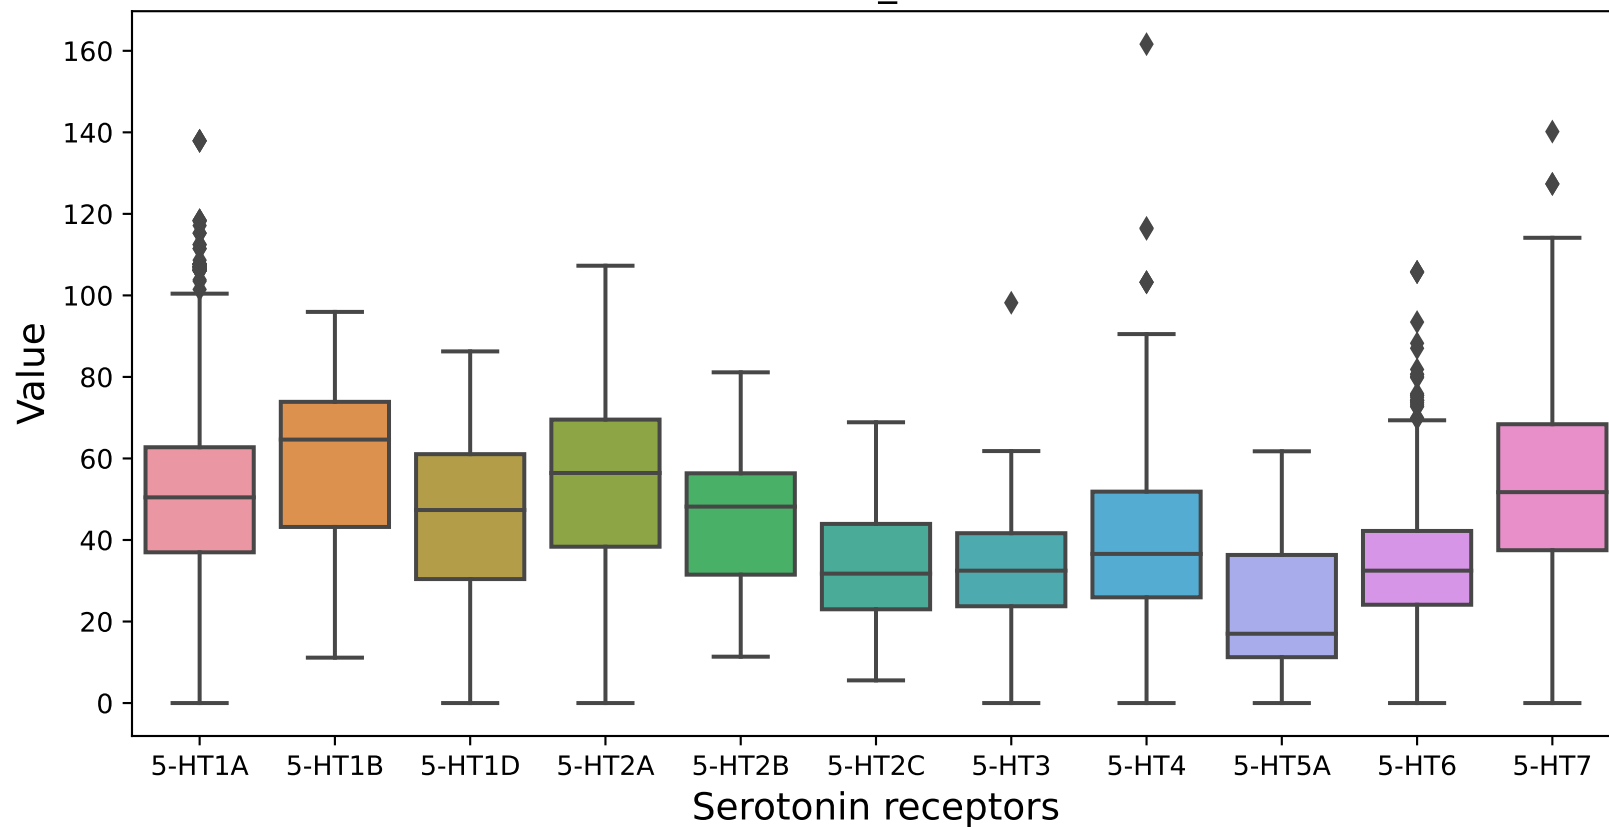

Kier1

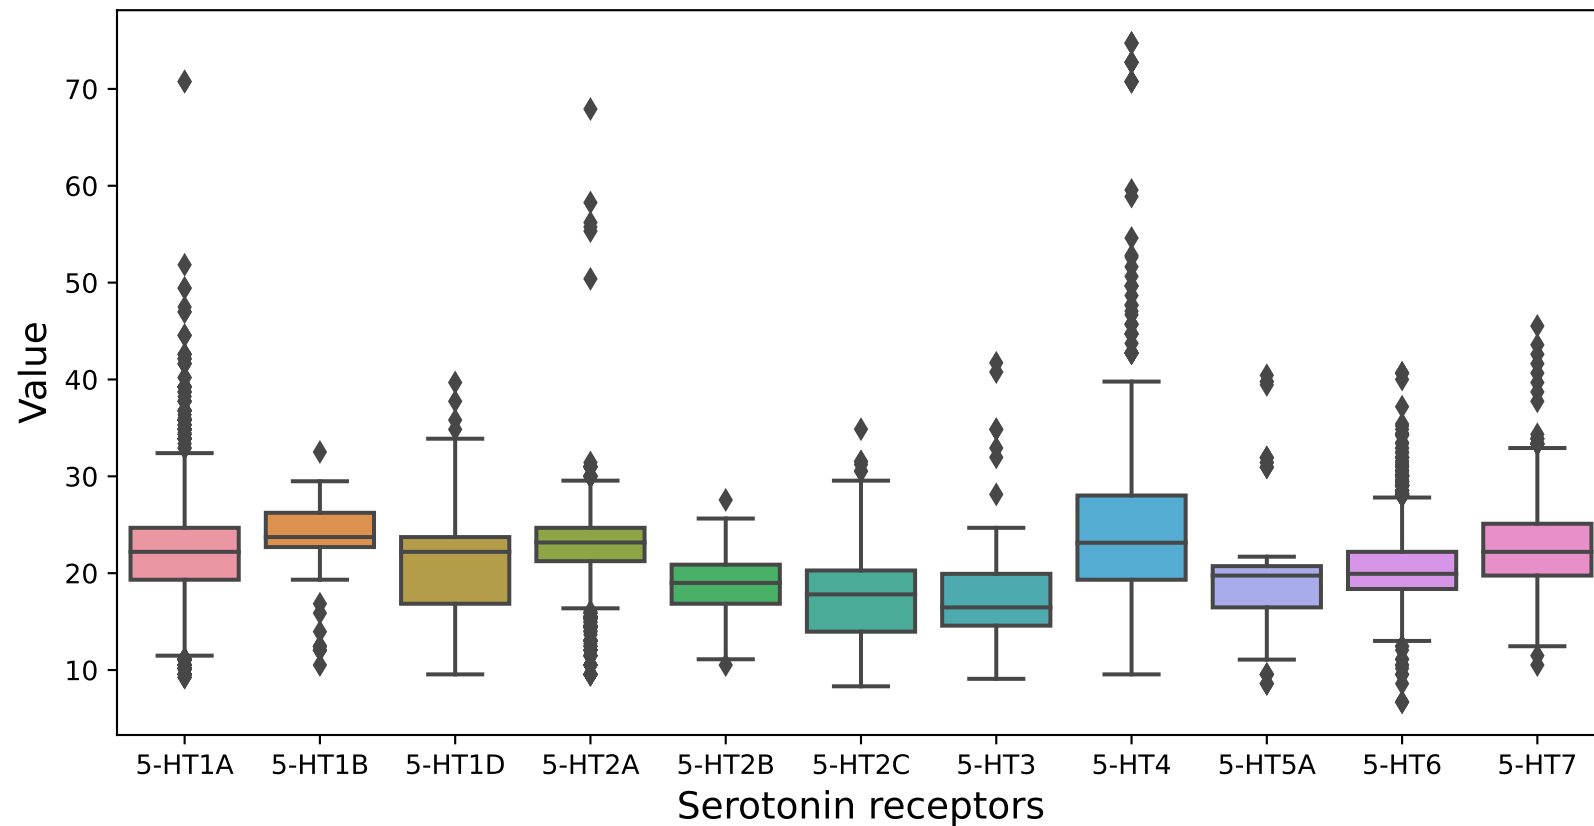



# LabuteASA

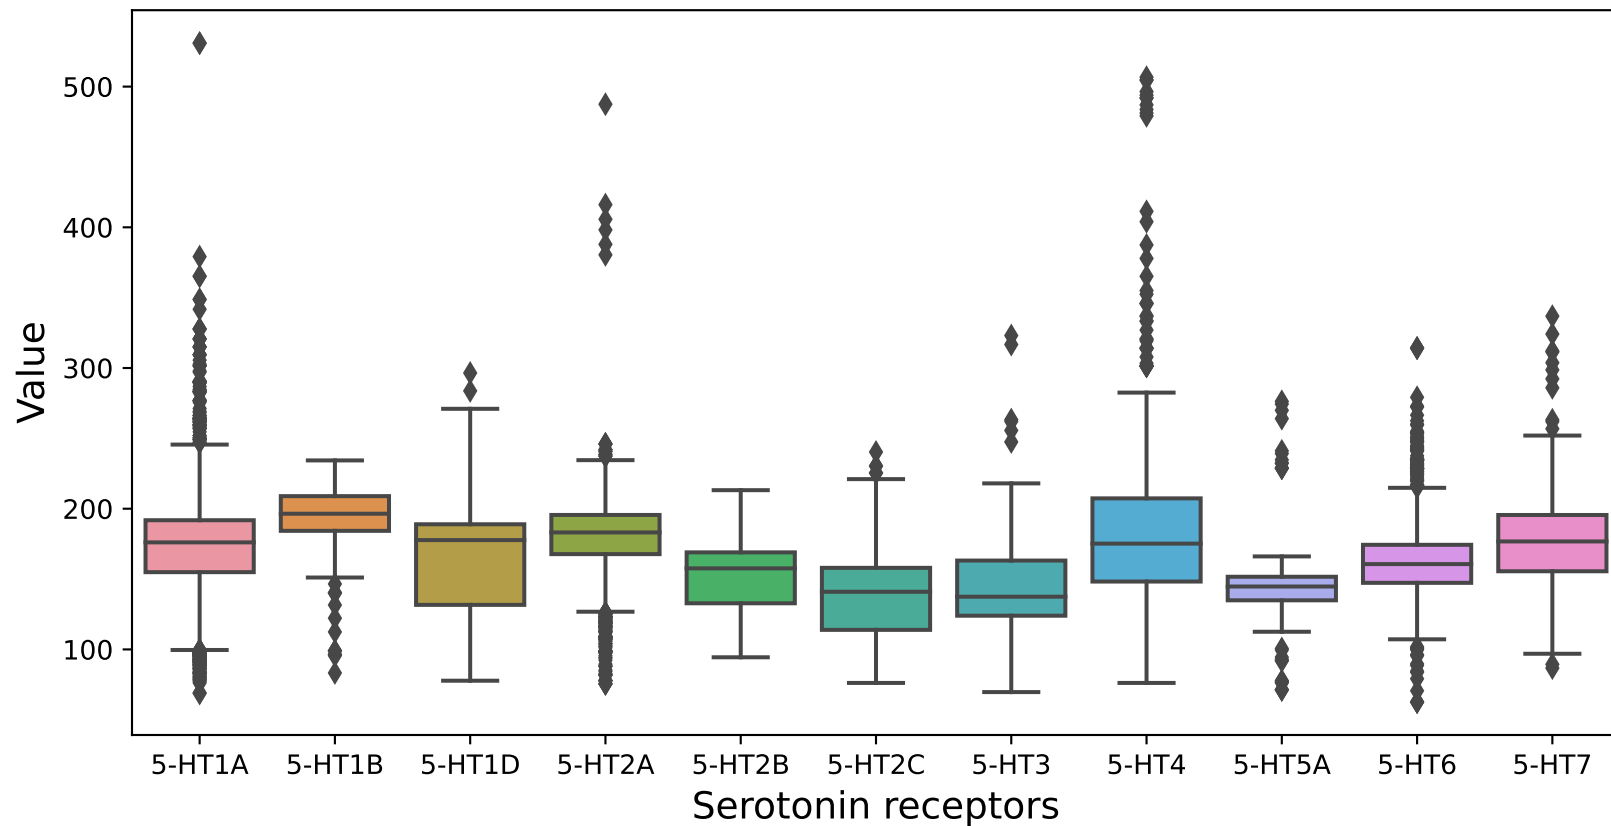

# MATS1v

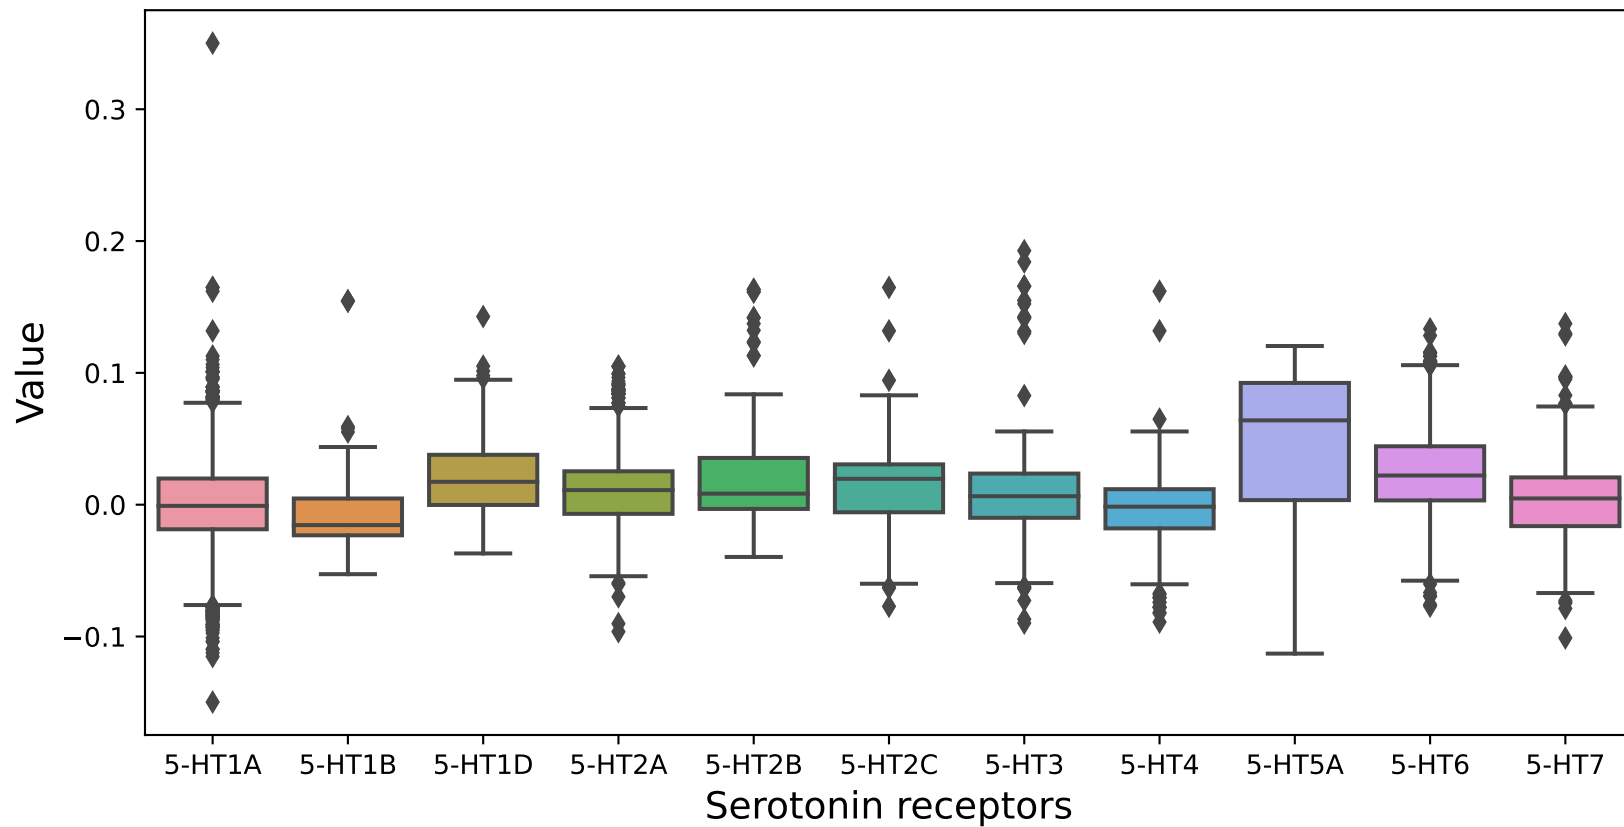

# MATS7dv

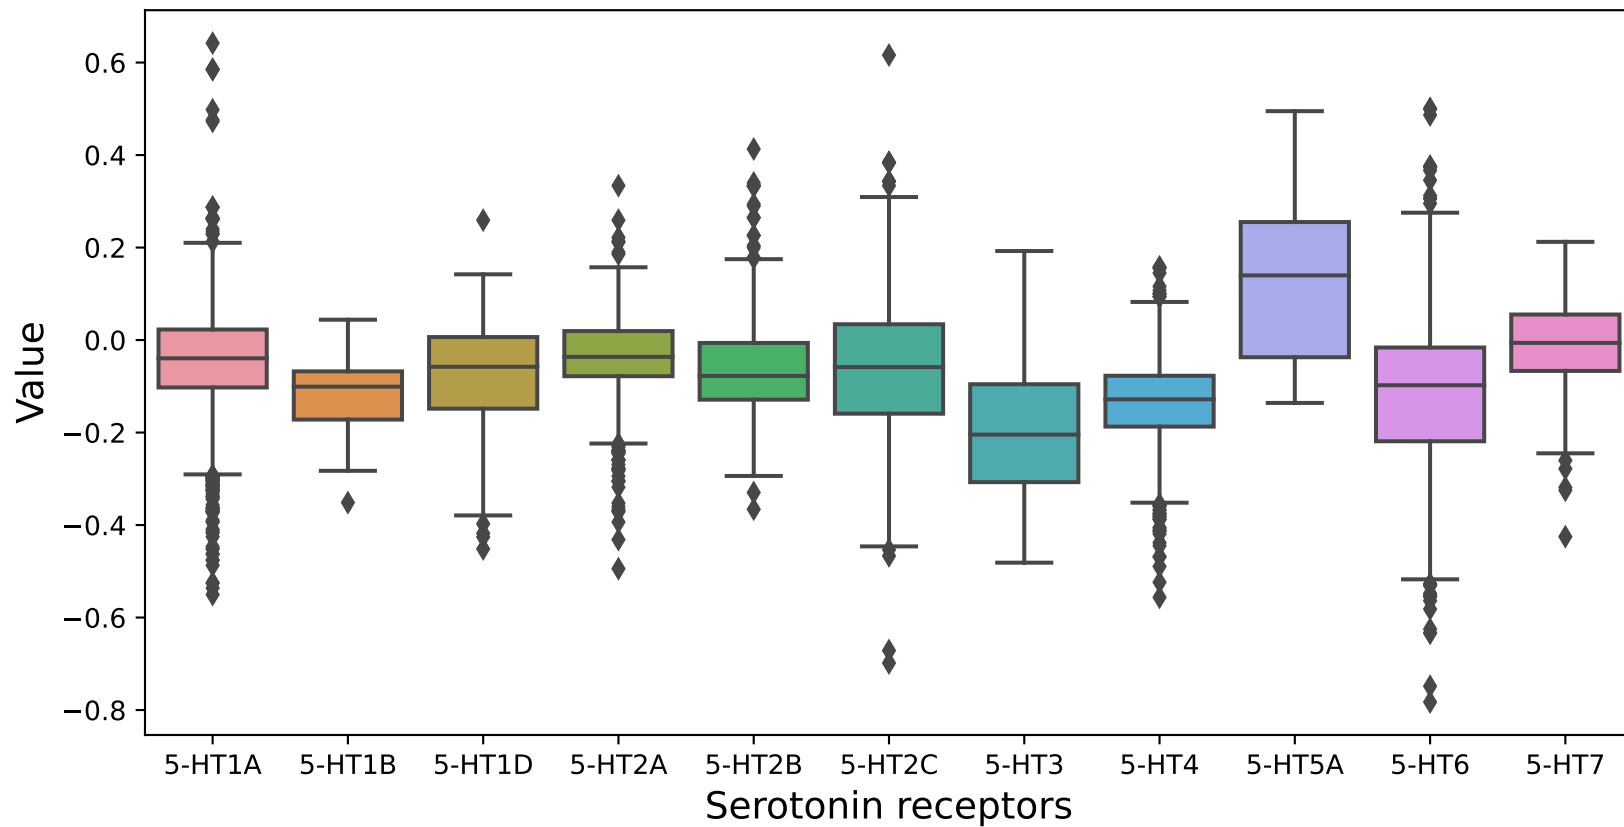

## MDEC-22

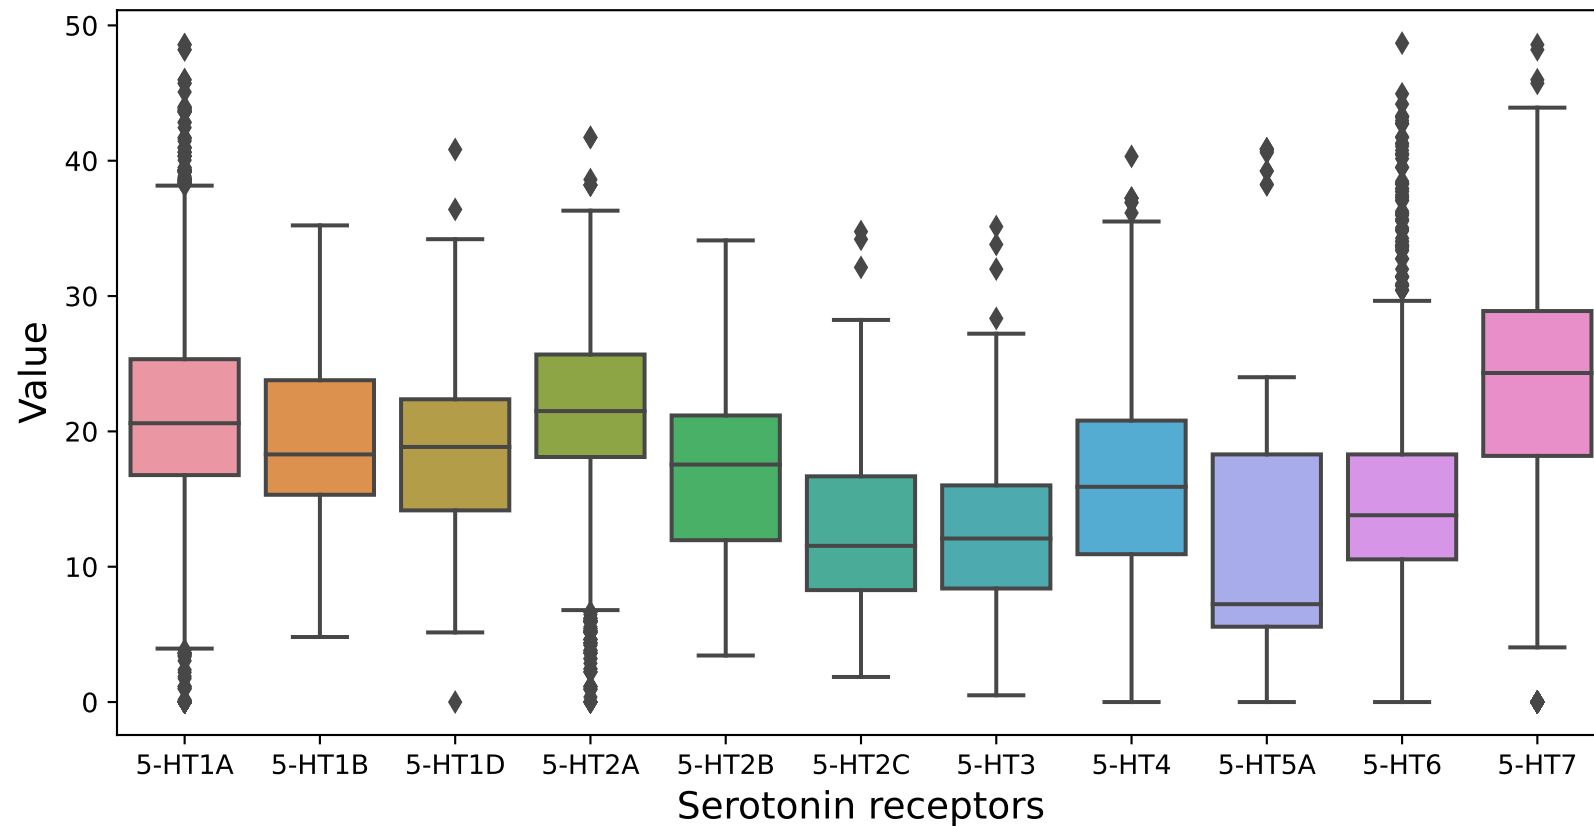

SlogP\_VSA2

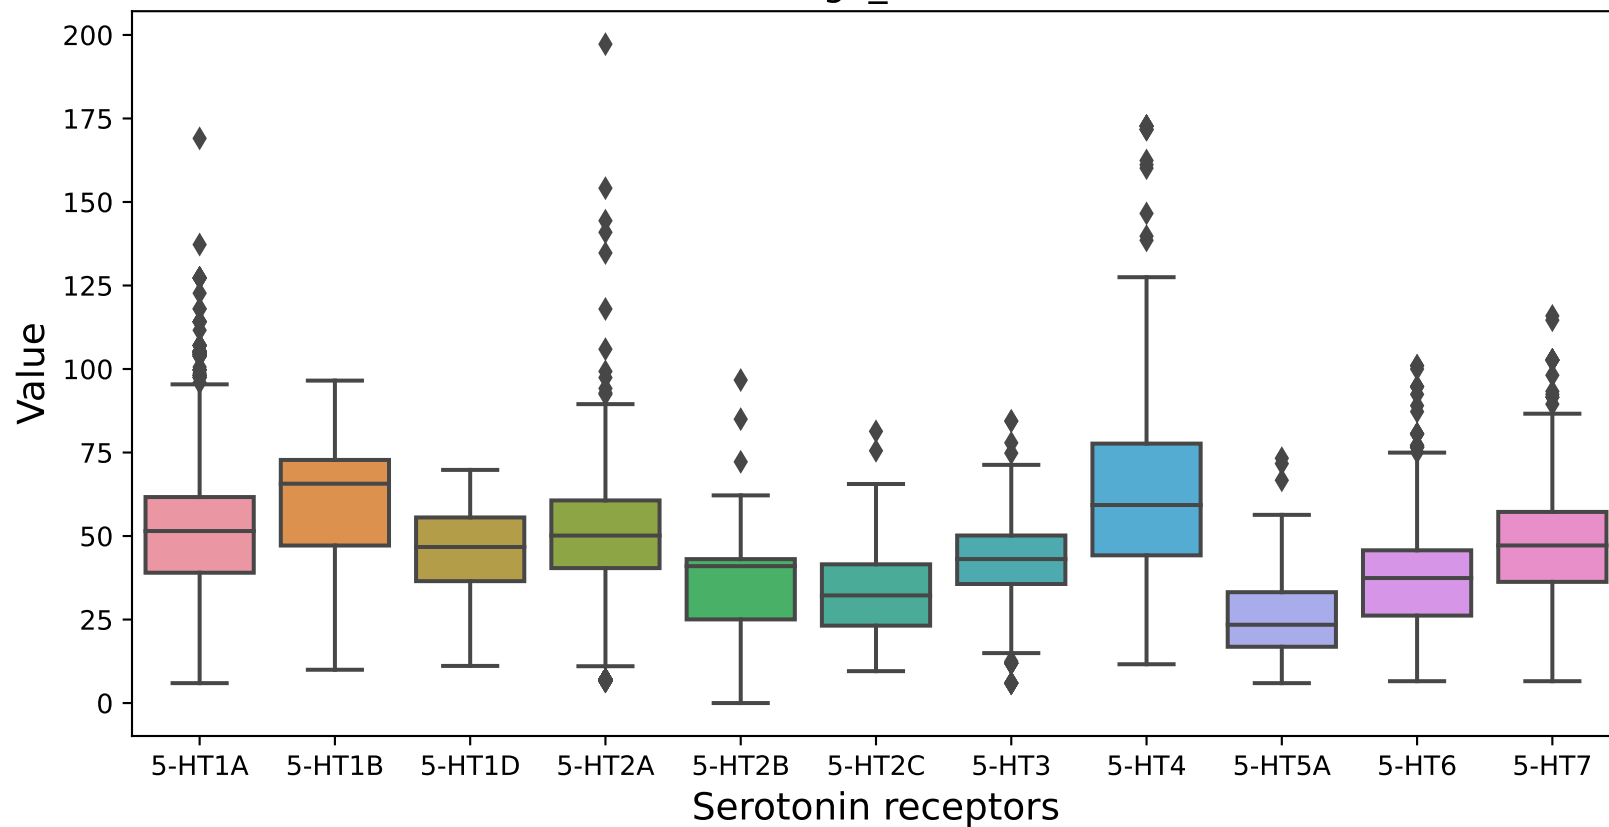

# Xp-4dv

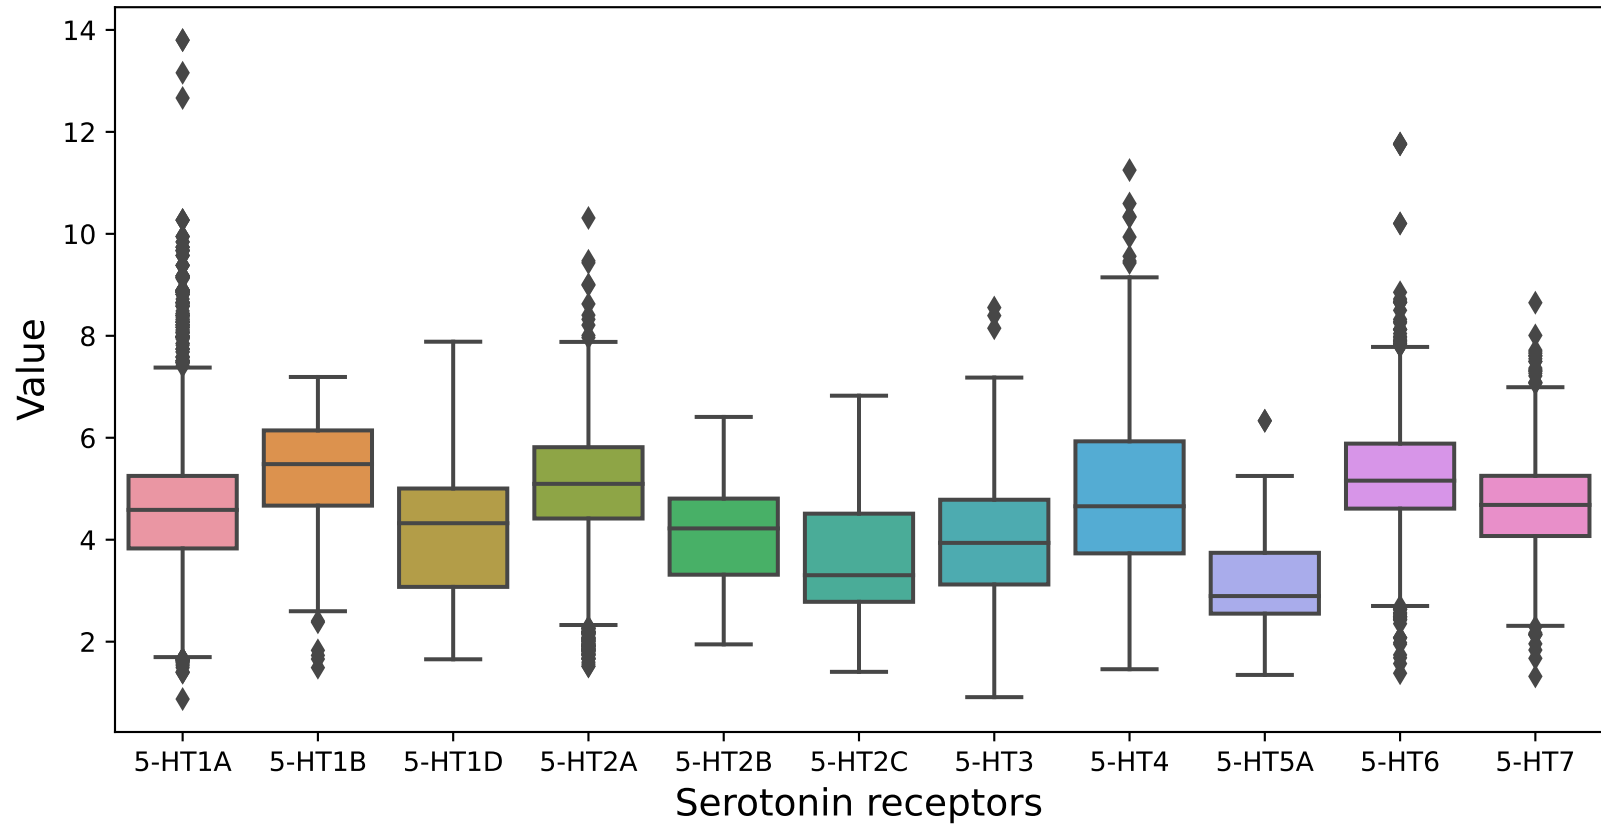

# Xp-5dv

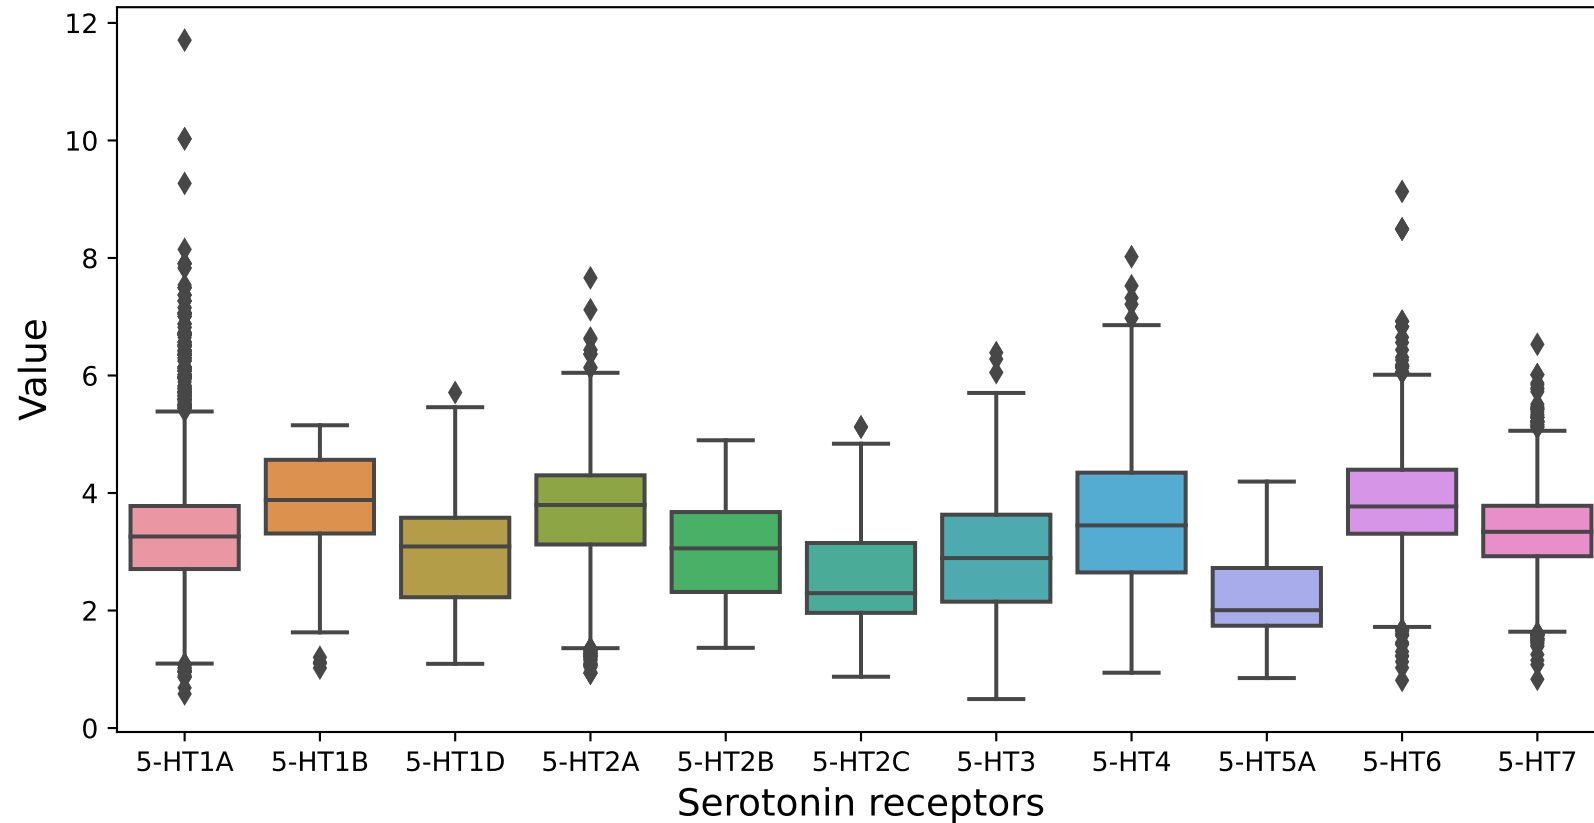

Supplement: s1 [file s1]
