# Supplementary material for: Integrated QSAR Models for Prediction of Serotonergic Activity: Machine Learning Unveiling Activity and Selectivity Patterns of Molecular Descriptors
Source: MDPI journal article supplement (doi:10.3390/pharmaceutics16030349), 2024-03-01

# Values of molecular descriptors for serotonergic active molecules

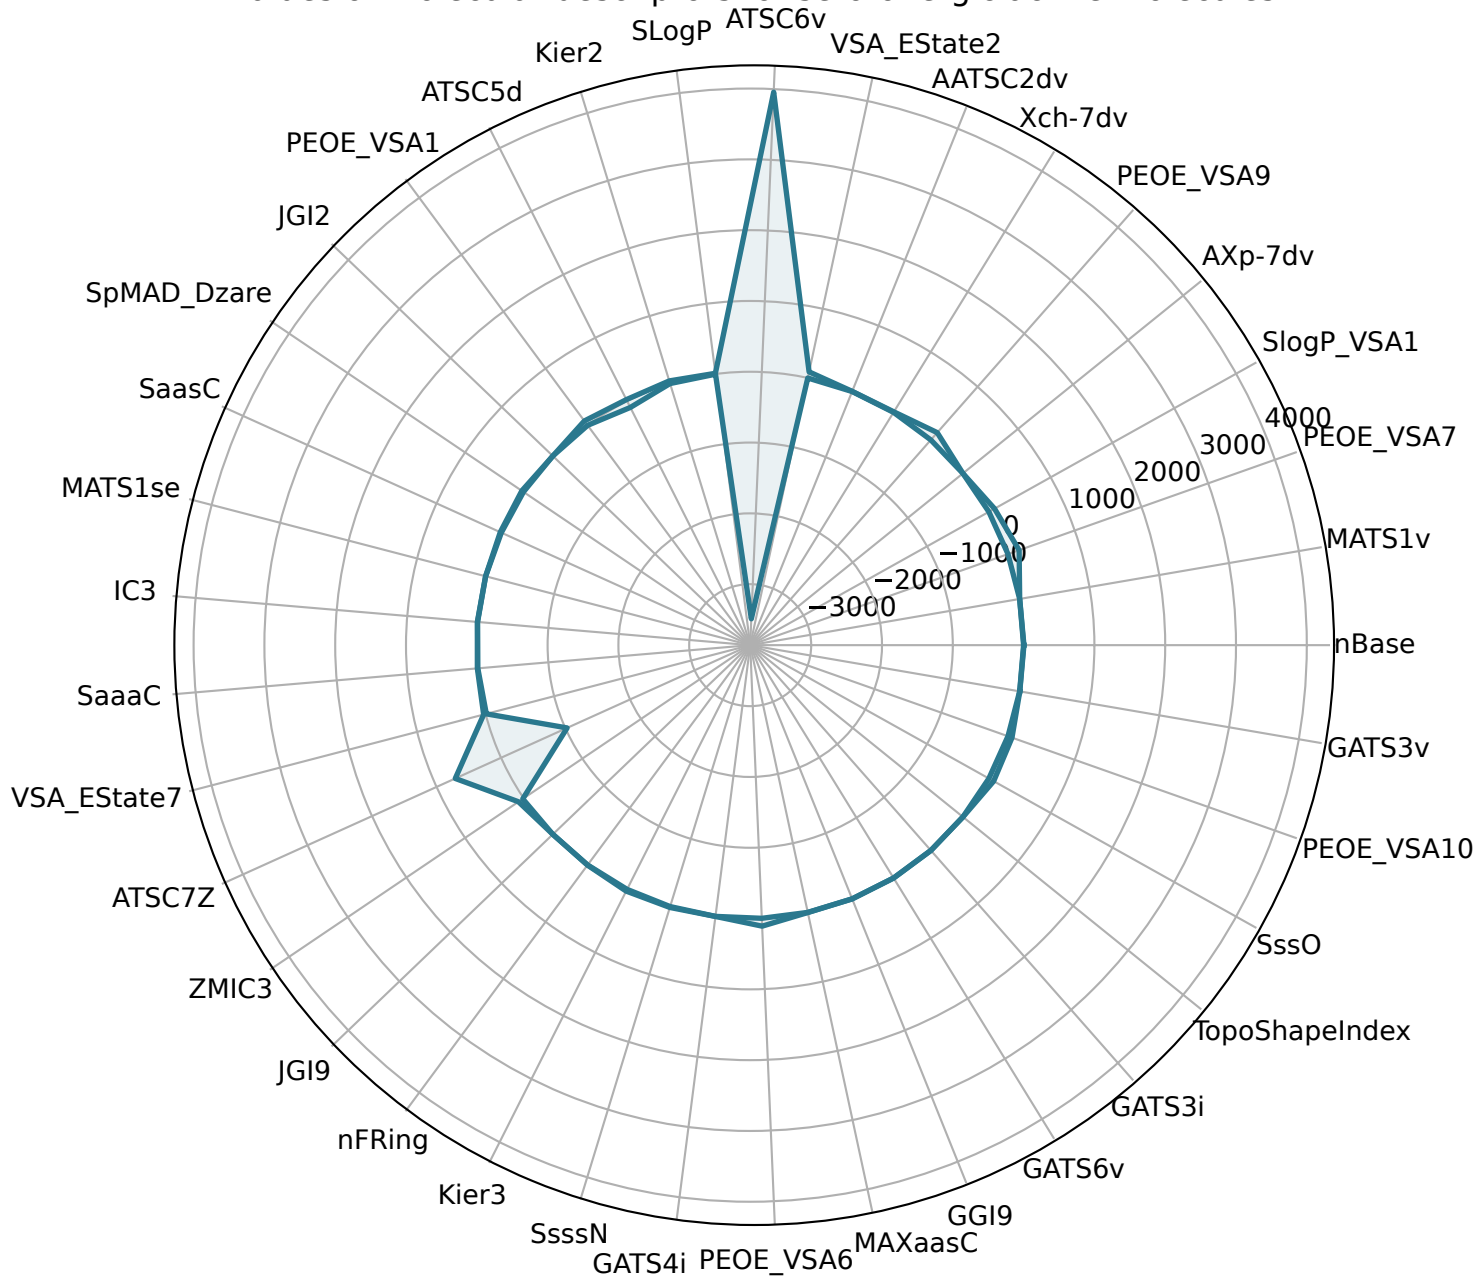

# Values of molecular descriptors for serotonergic active molecules

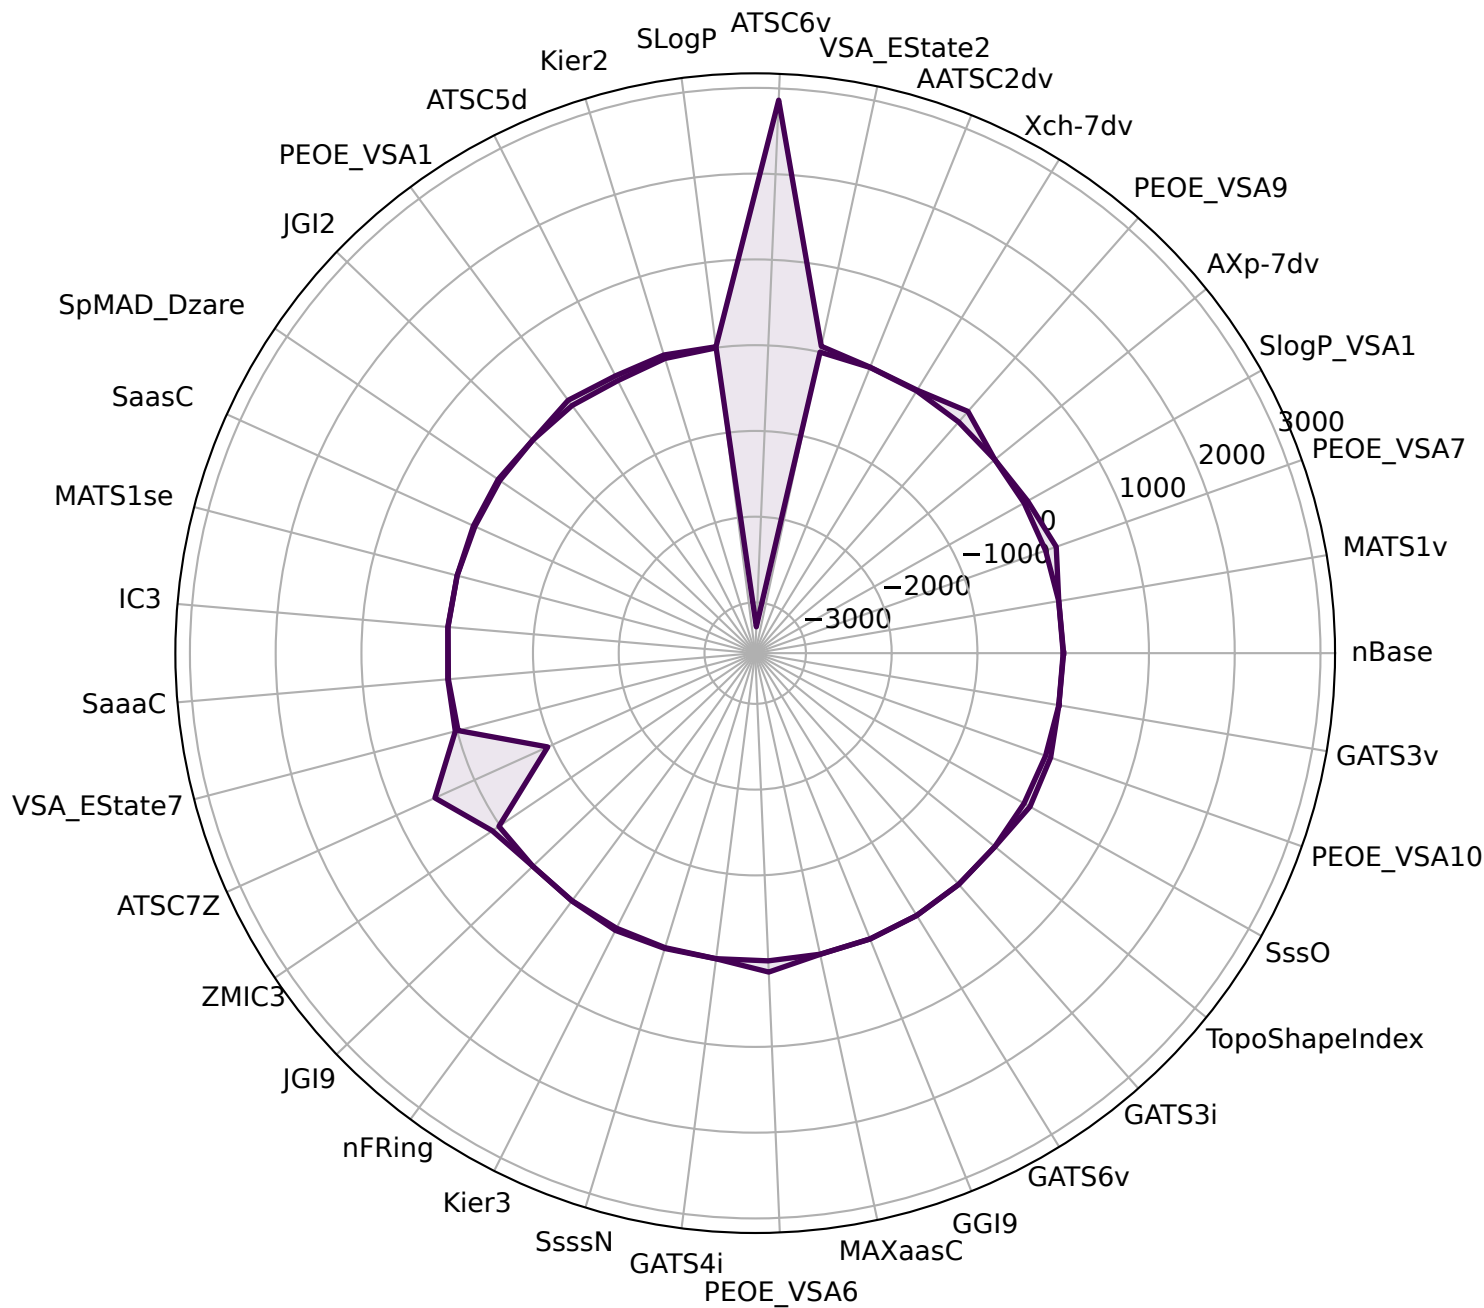

# Values of molecular descriptors for active and inactive molecules

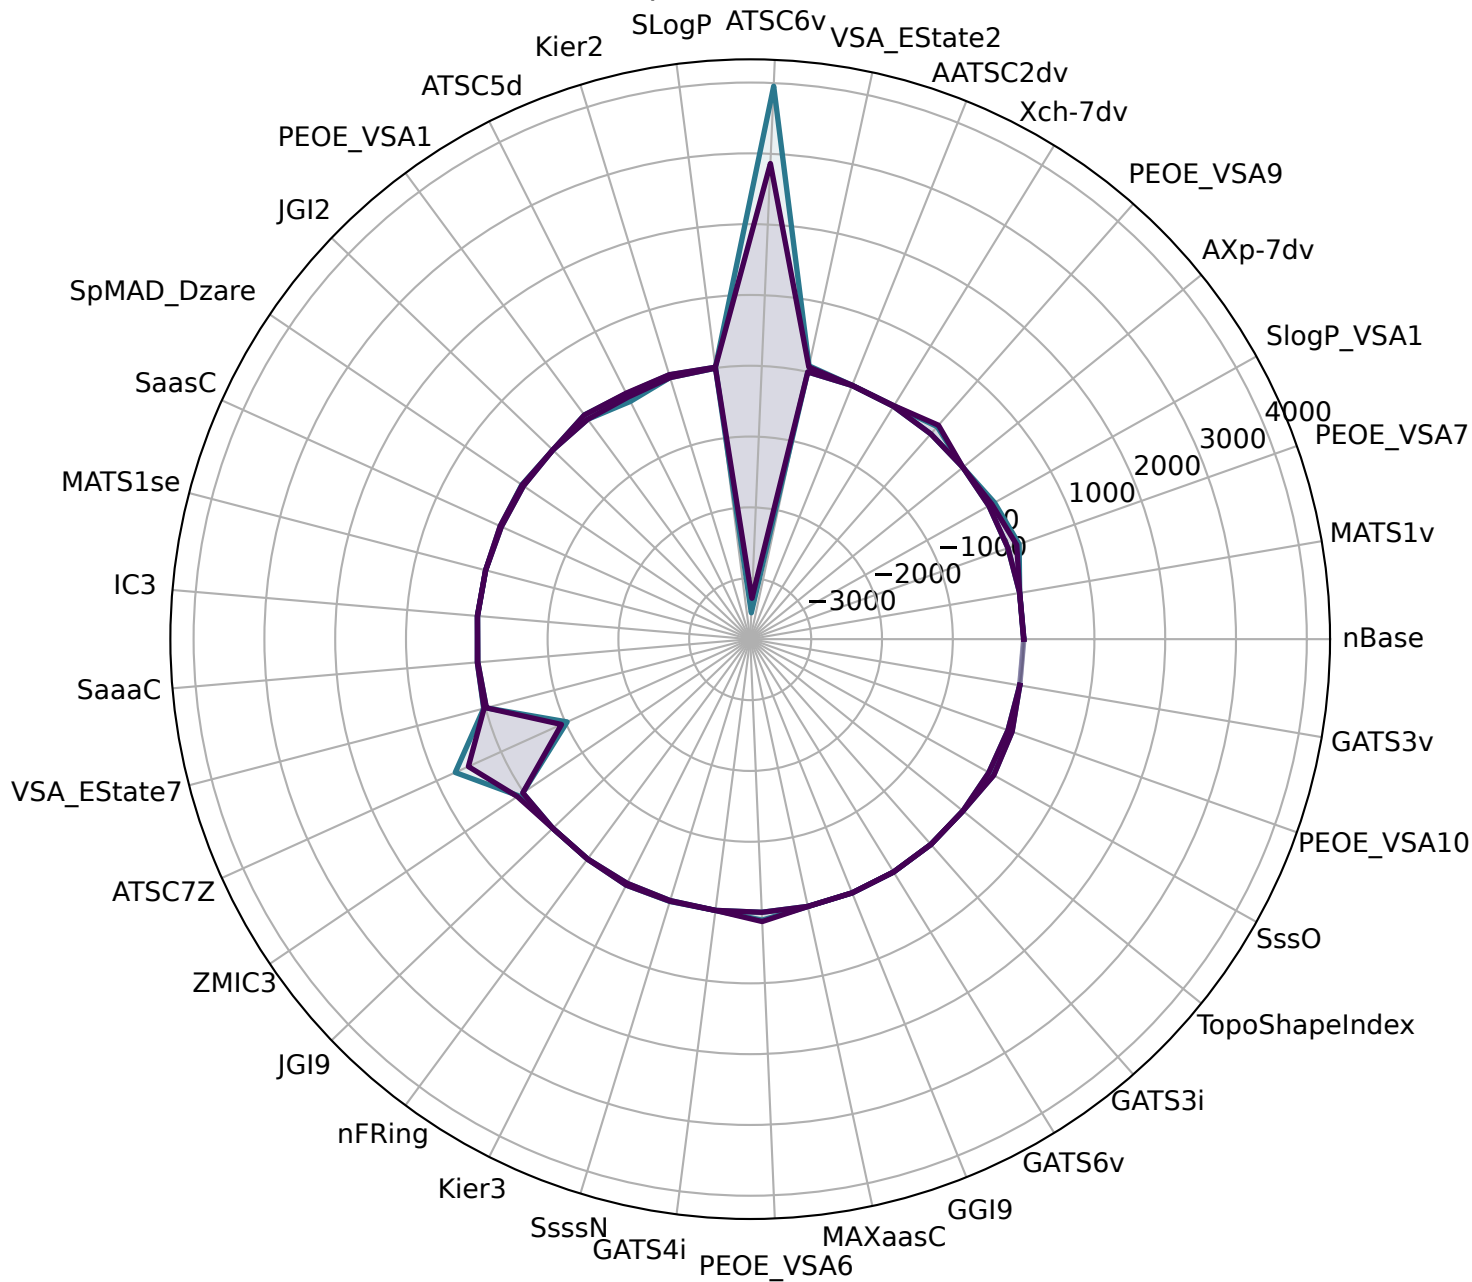

Normalized values of molecular descriptors for active and inactive compounds

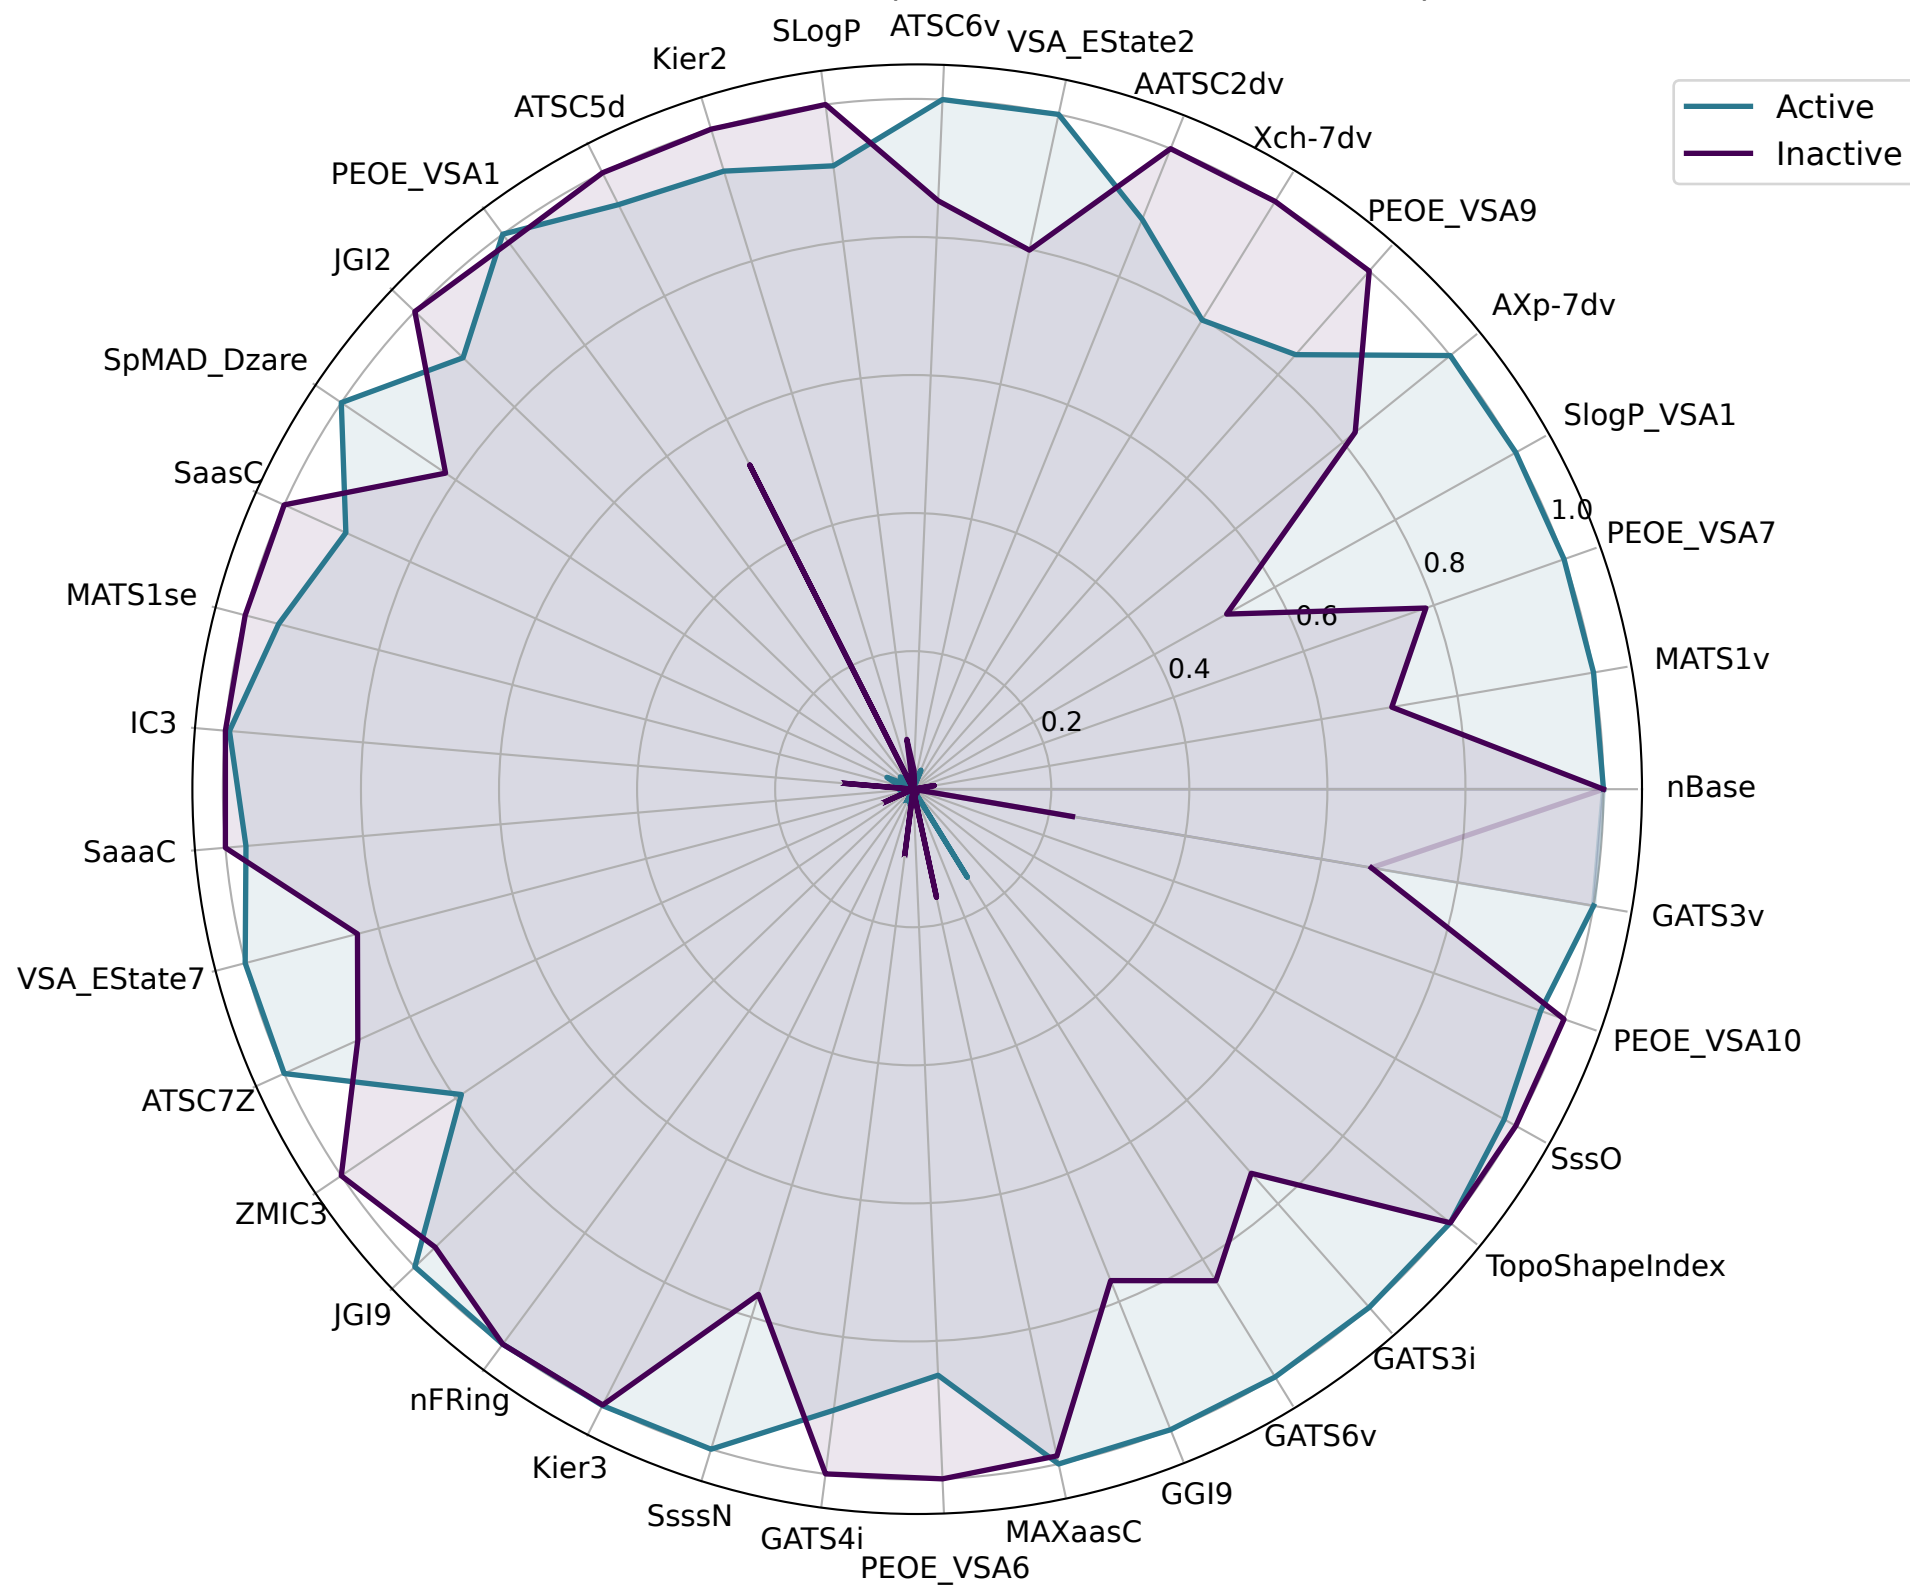

Supplement: s1 [file s1]
