# Supplementary material for: Integrated QSAR Models for Prediction of Serotonergic Activity: Machine Learning Unveiling Activity and Selectivity Patterns of Molecular Descriptors
Source: MDPI journal article supplement (doi:10.3390/pharmaceutics16030349), 2024-03-01
Supplement: s1 [file s1]

Supplementary S3: Value range of the most important descriptors for serotonergic activity  
model based on entire database

| Descriptor     | Active              | Inactive             |
|----------------|---------------------|----------------------|
| nBase          | 0 - 5               | 0 - 5                |
| MATS1v         | -0.15 - 0.35        | -0.134 - 0.202       |
| PEOE_VSA7      | 0.0 - 167.025       | 0.0 - 131.574        |
| SlogP_VSA1     | 0.0 - 91.375        | 0.0 - 47.525         |
| AXp-7dv        | 0.004 - 0.068       | 0.004 - 0.057        |
| PEOE_VSA9      | 0.0 - 137.285       | 0.0 - 163.712        |
| Xch-7dv        | 0.0 - 8.247         | 0.0 - 10.333         |
| AATSC2dv       | -0.662 - 2.213      | -0.76 - 2.582        |
| VSA_EState2    | -1.306 - 87.06      | -0.47 - 69.287       |
| ATSC6v         | -3489.32 - 3956.086 | -3283.871 - 2862.563 |
| SLogP          | -3.24 - 9.445       | -2.226 - 10.693      |
| Kier2          | 2.939 - 41.981      | 2.146 - 44.684       |
| ATSC5d         | -101.306 - 22.712   | -32.539 - 29.463     |
| PEOE_VSA1      | 0.0 - 77.268        | 0.0 - 76.116         |
| JGI2           | 0.031 - 0.144       | 0.028 - 0.156        |
| SpMAD_Dzare    | 3.74 - 31.57        | 3.418 - 26.437       |
| SaasC          | -3.852 - 12.205     | -4.633 - 14.035      |
| MATS1se        | -0.377 - 0.416      | -0.396 - 0.459       |
| IC3            | 2.969 - 6.109       | 3.303 - 6.127        |
| SaaaC          | -0.56 - 6.184       | -0.699 - 6.396       |
| VSA_EState7    | -10.188 - 28.721    | -10.783 - 22.081     |
| ATSC7Z         | -1023.77 - 709.752  | -936.333 - 506.879   |
| ZMIC3          | 15.555 - 88.704     | 15.542 - 108.155     |
| JGI9           | 0.0 - 0.027         | 0.0 - 0.026          |
| nFRing         | 0 - 3               | 0 - 3                |
| Kier3          | 1.249 - 29.045      | 0.517 - 29.018       |
| SsssN          | 0.0 - 13.116        | 0.0 - 10.038         |
| GATS4i         | 0.429 - 1.433       | 0.54 - 1.536         |
| PEOE_VSA6      | 0.0 - 110.967       | 0.0 - 130.584        |
| MAXaasC        | -0.572 - 1.709      | -0.206 - 1.682       |
| GGI9           | 0.0 - 1.413         | 0.0 - 1.084          |
| GATS6v         | 0.382 - 1.925       | 0.111 - 1.628        |
| GATS3i         | 0.553 - 2.01        | 0.564 - 1.633        |
| TopoShapeIndex | 0.0 - 1.0           | 0.0 - 1.0            |
| SssO           | 0.0 - 77.604        | 0.0 - 79.125         |
| PEOE_VSA10     | 0.0 - 60.131        | 0.0 - 62.373         |
| GATS3v         | 0.294 - 1.999       | 0.693 - 1.442        |
