# Supplementary material for: Integrated QSAR Models for Prediction of Serotonergic Activity: Machine Learning Unveiling Activity and Selectivity Patterns of Molecular Descriptors
Source: MDPI journal article supplement (doi:10.3390/pharmaceutics16030349), 2024-03-01

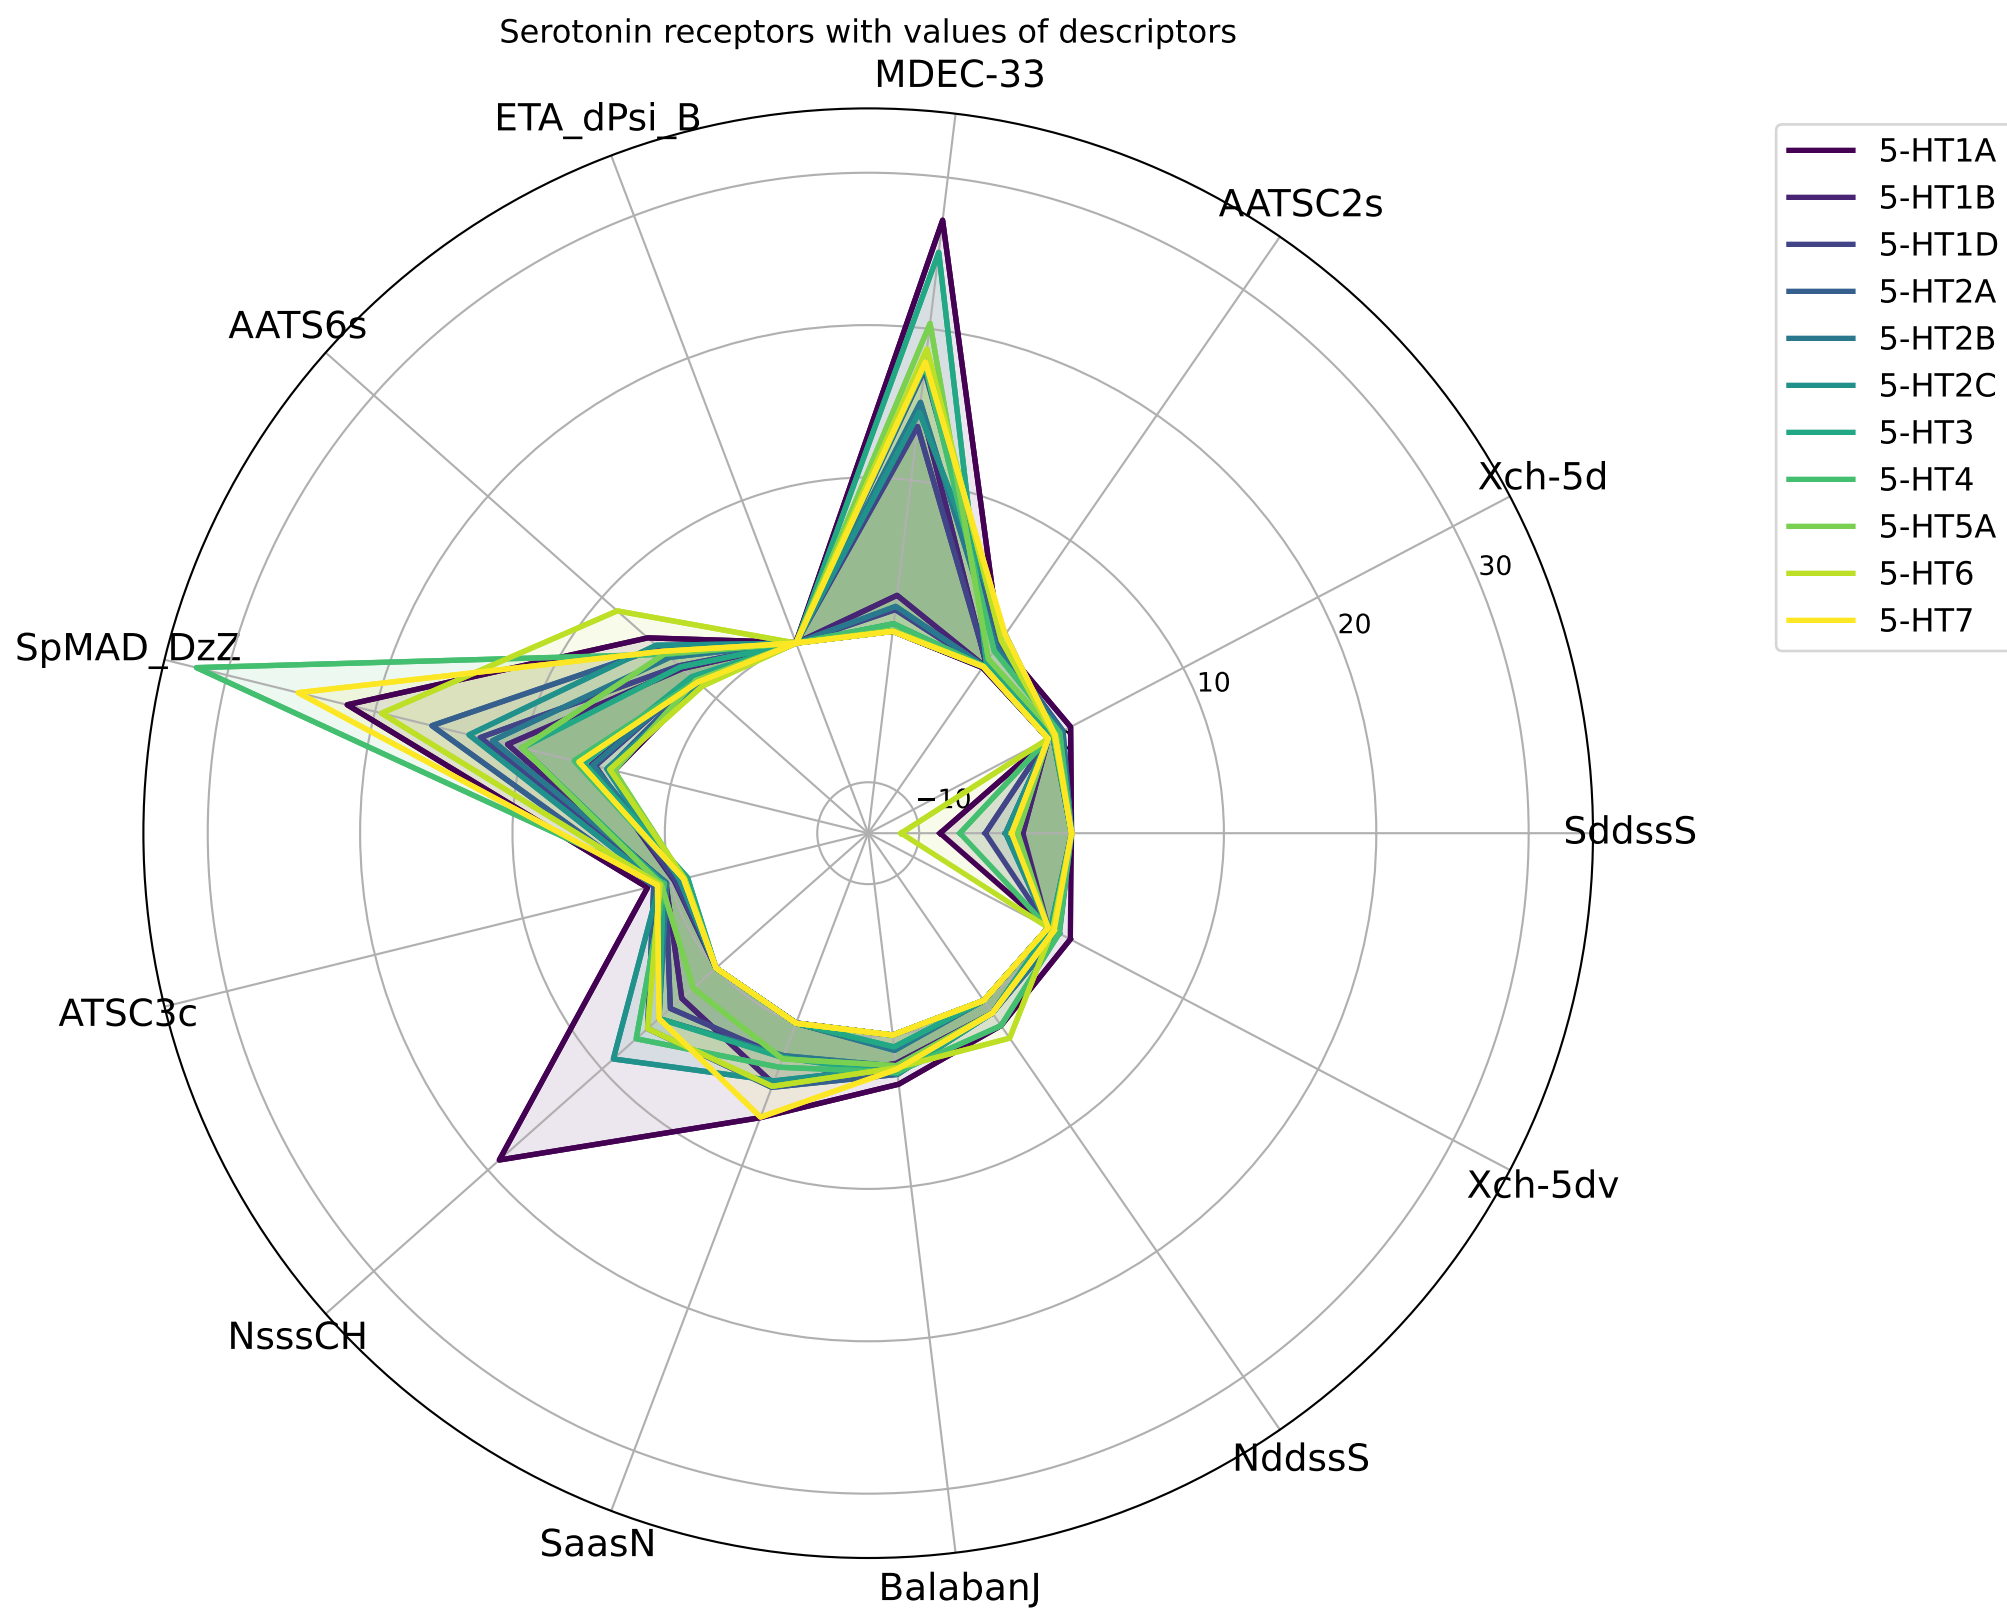

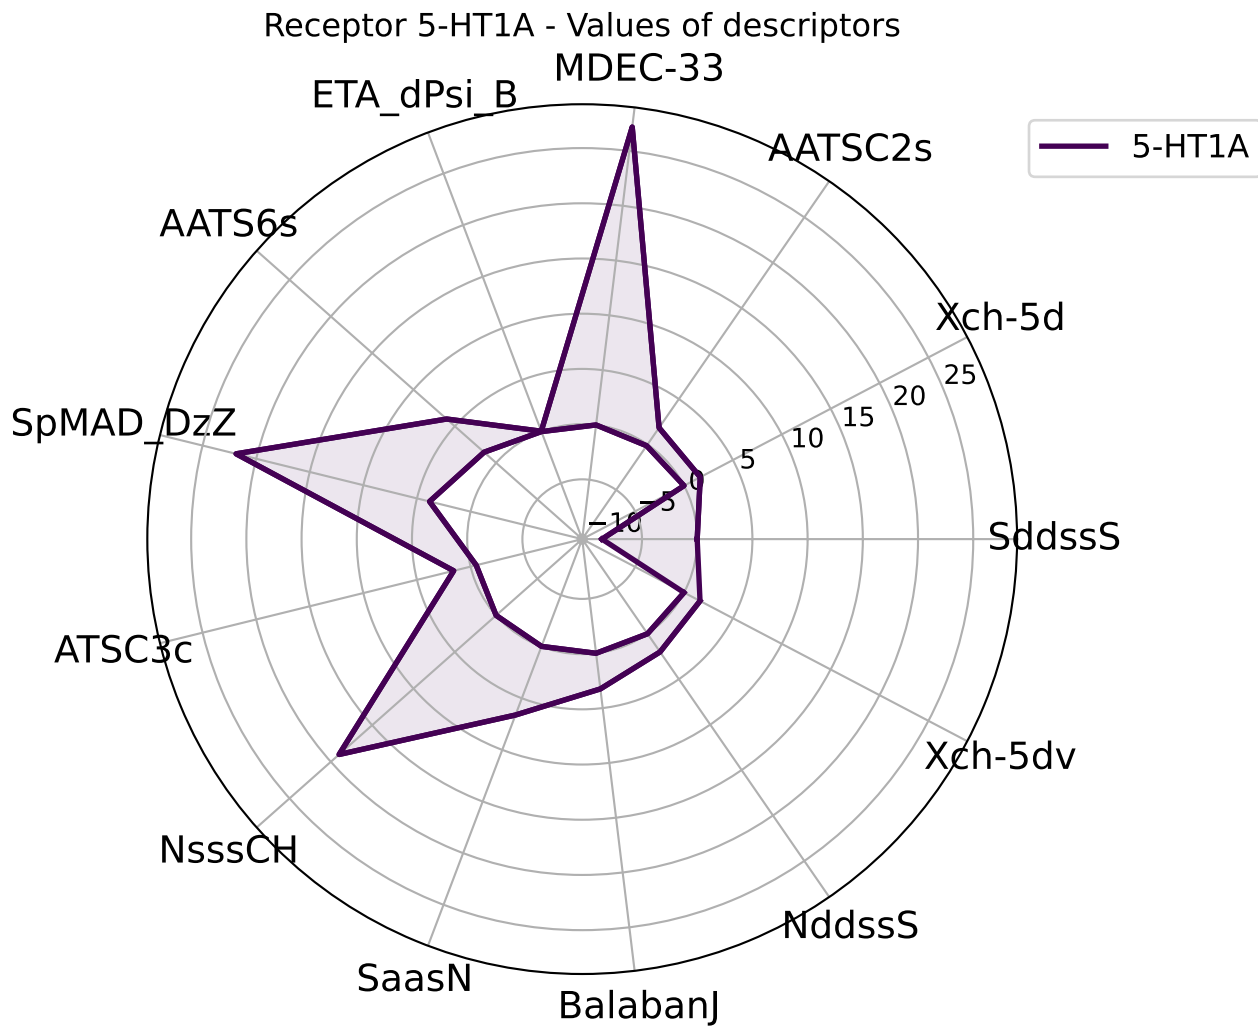

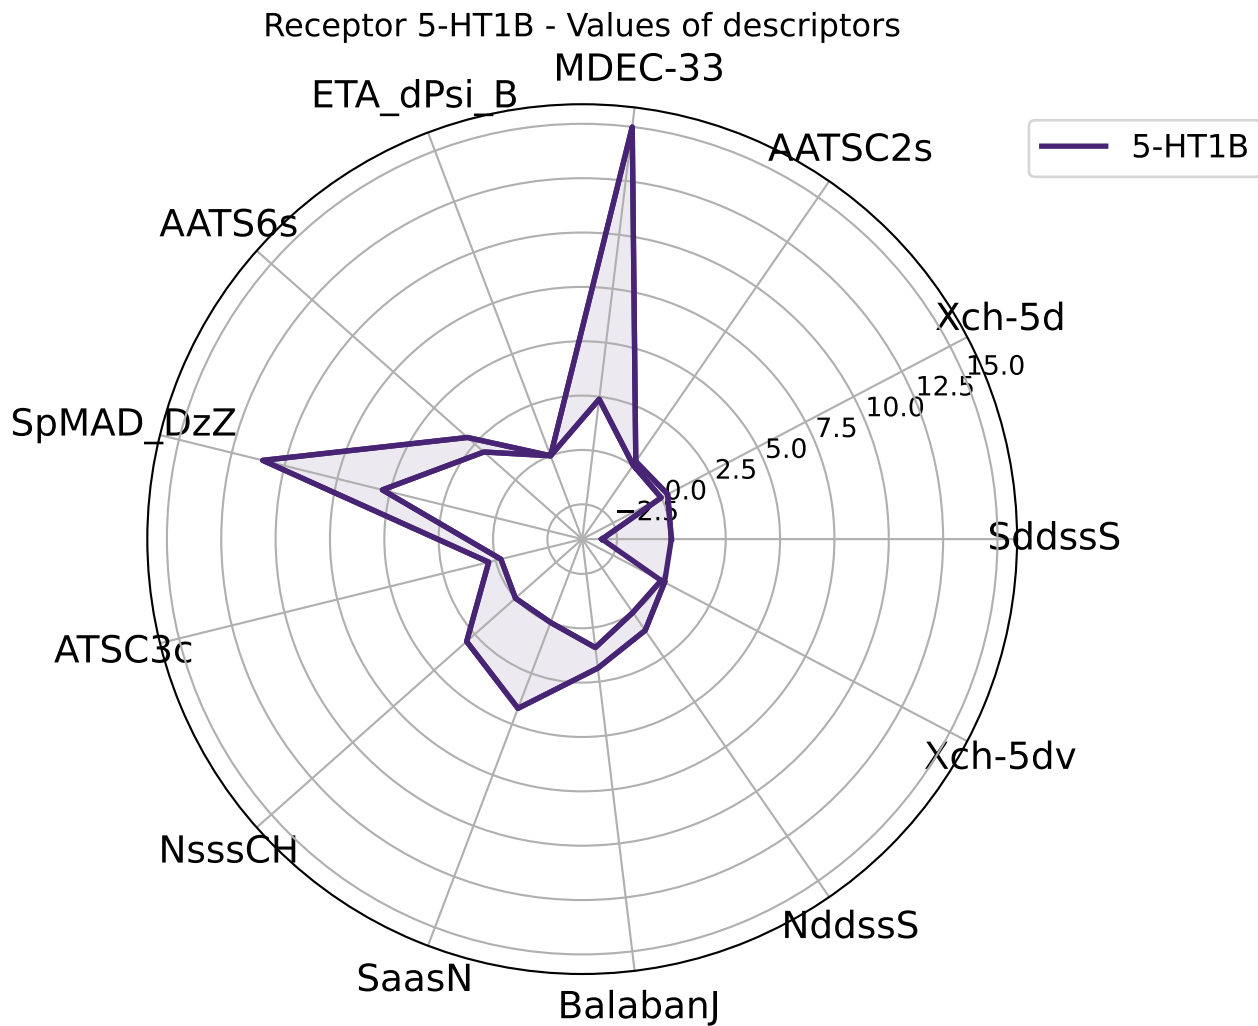

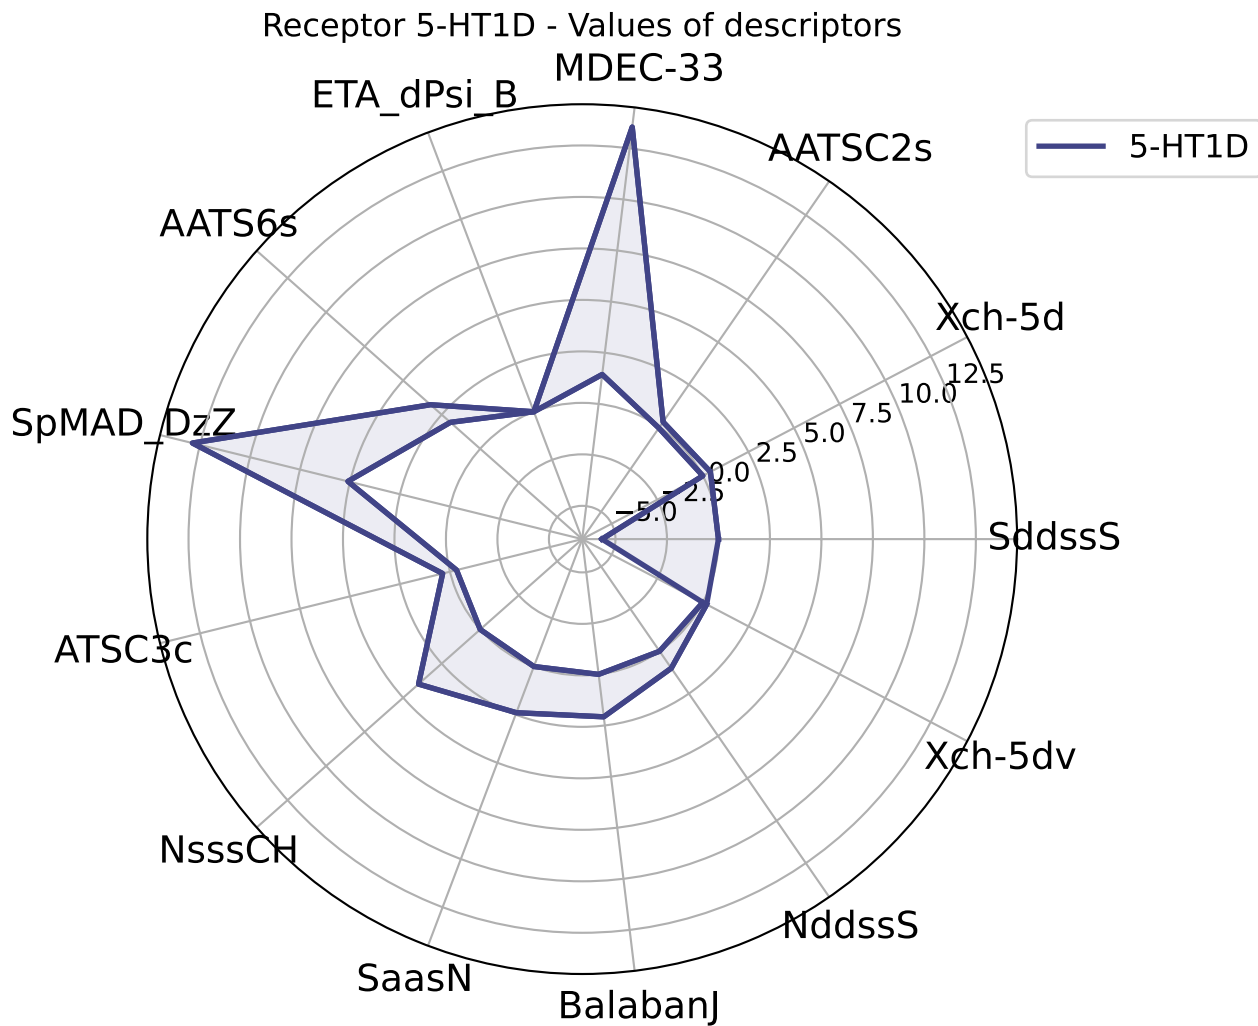

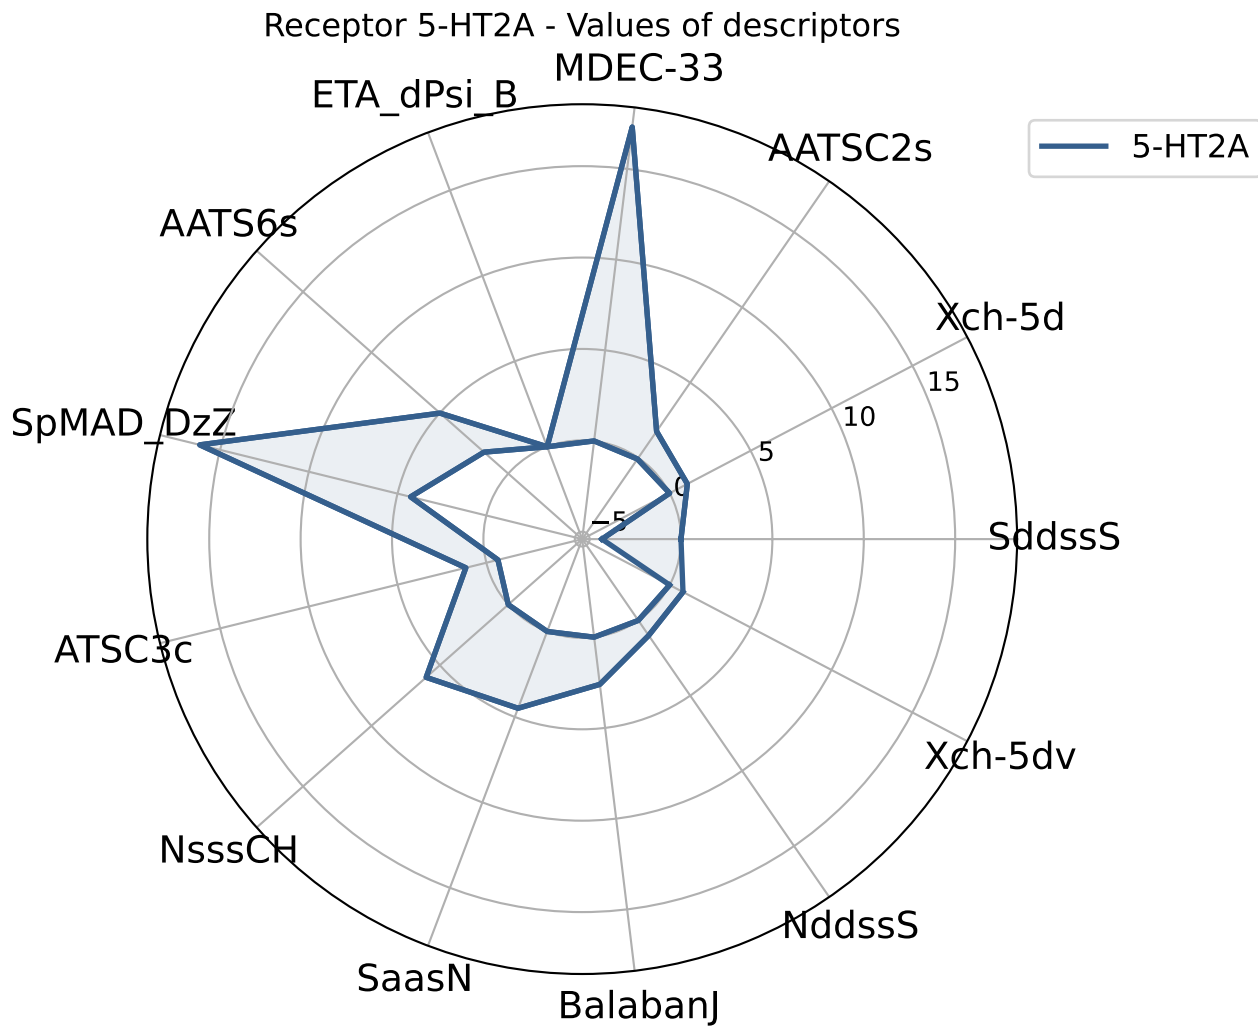

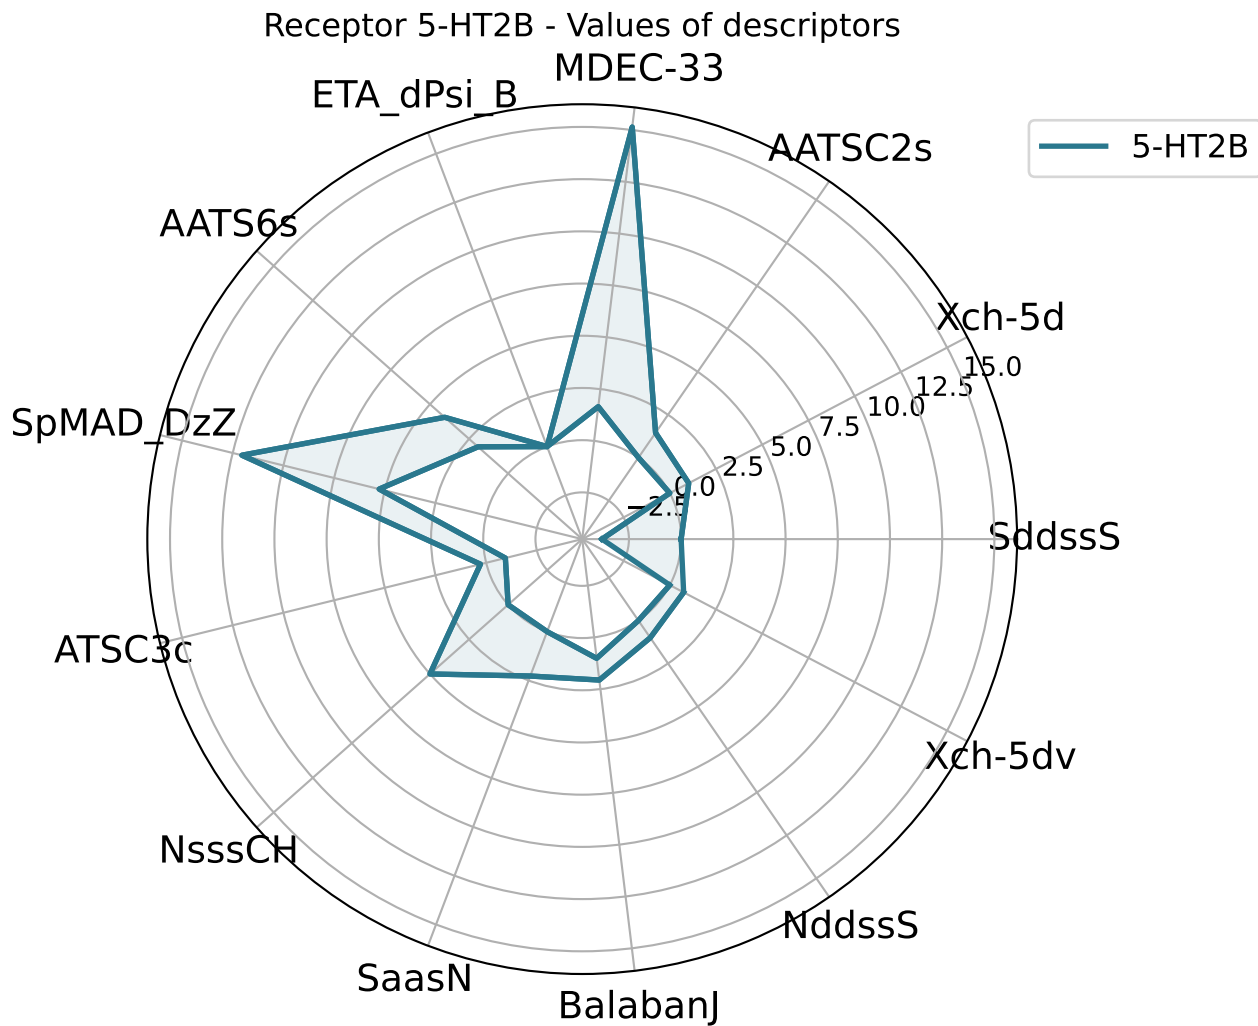

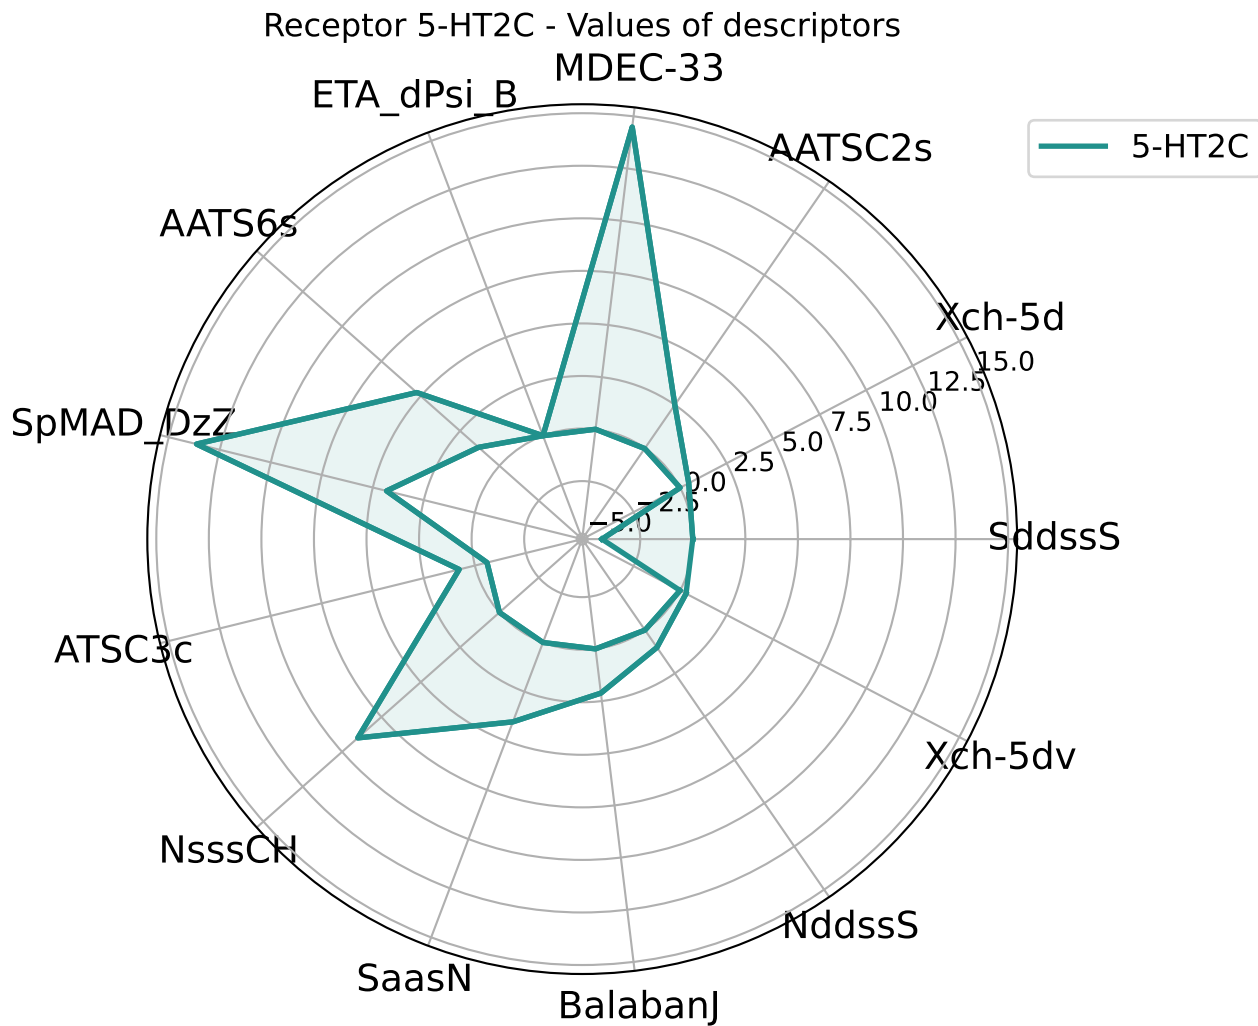

# Receptor 5-HT3 - Values of descriptors

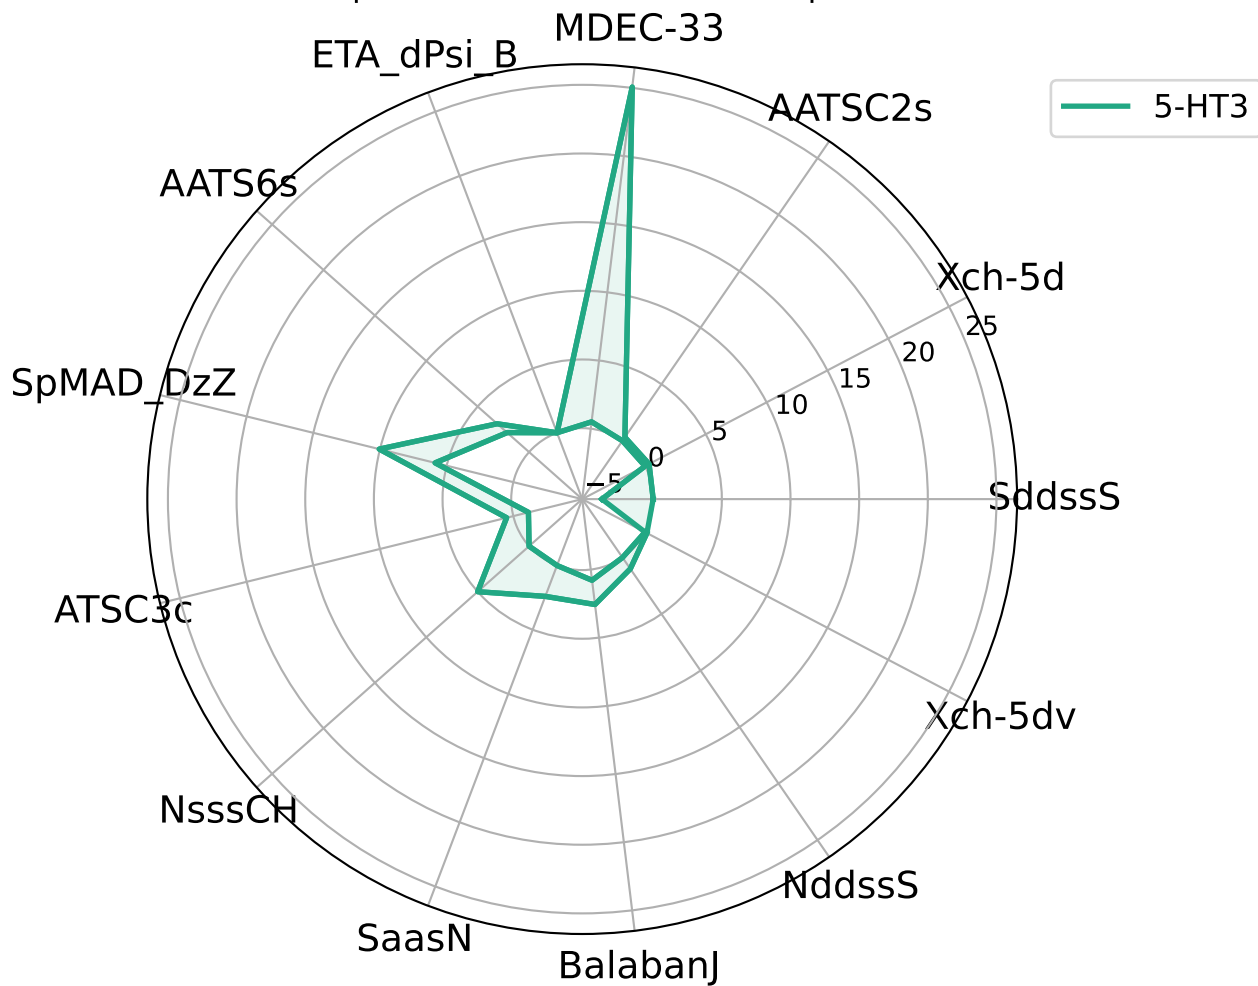



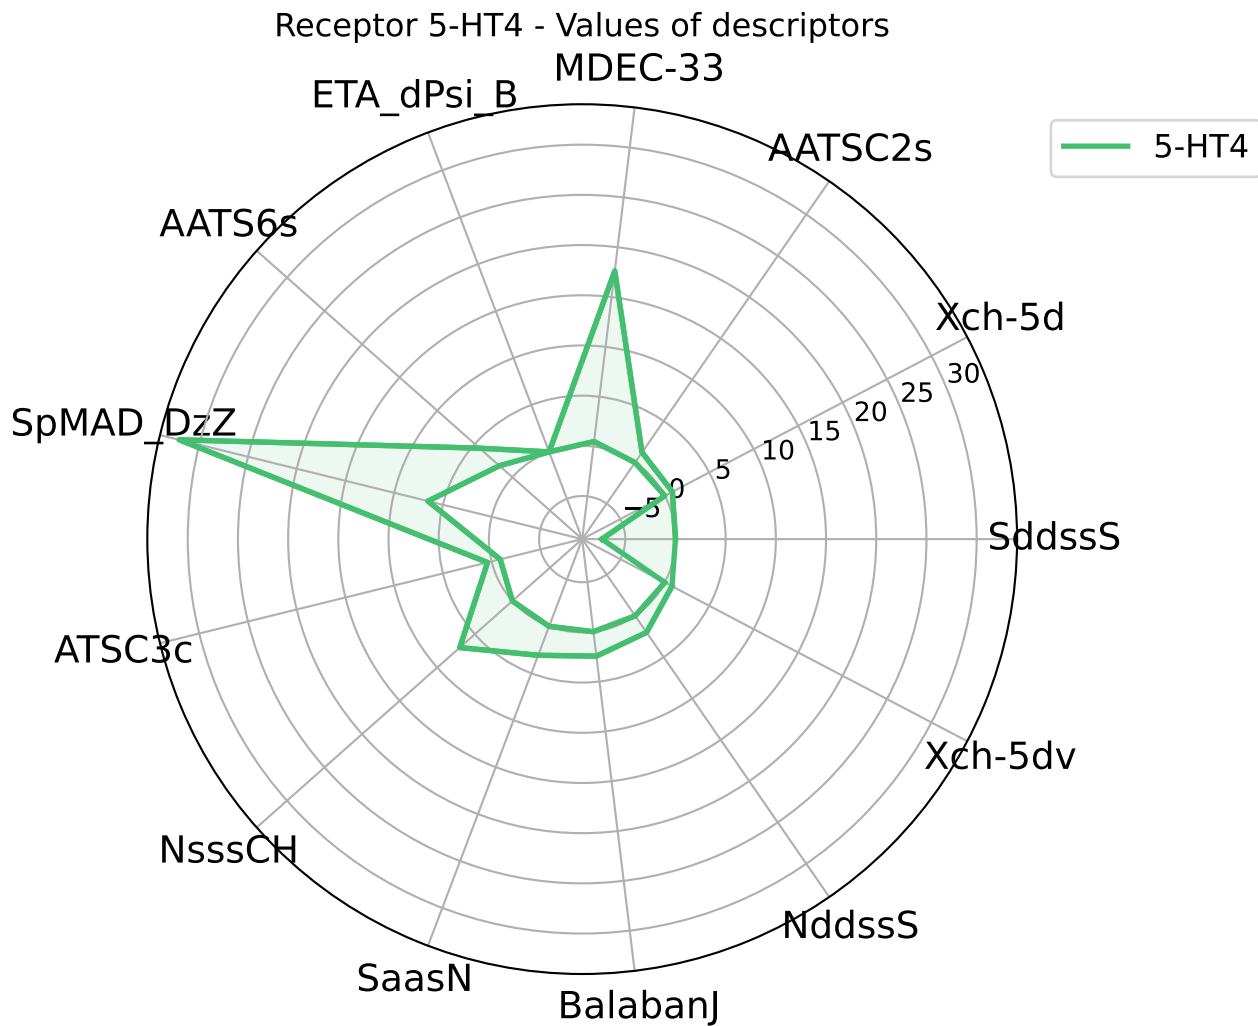

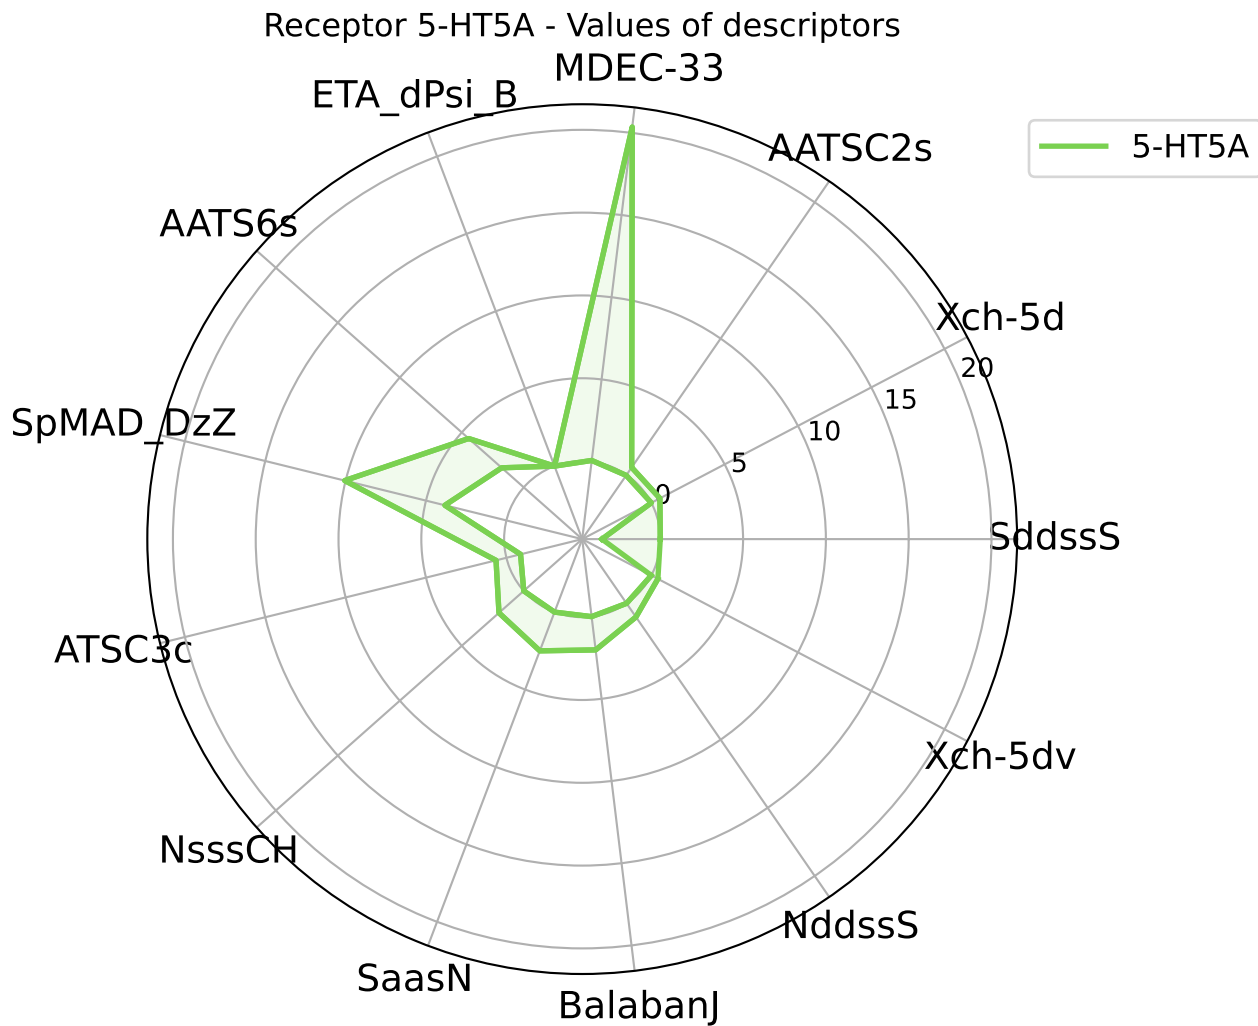

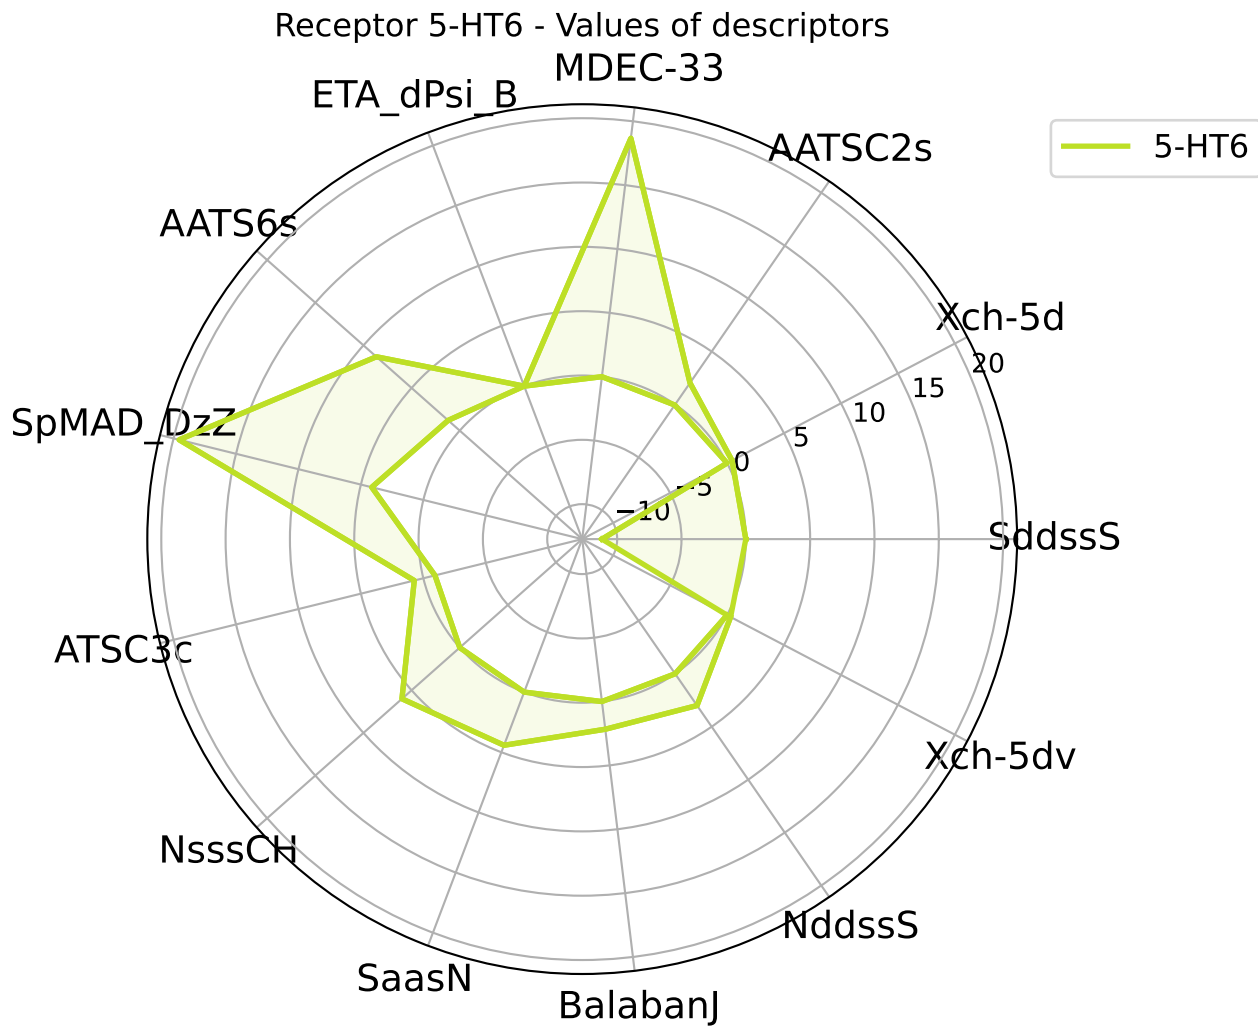

# Receptor 5-HT7 - Values of descriptors

MDEC-33

ETA\_dPsi\_B

AATSC2s

5-HT7

AATS6s

Xch-5d

SpMAD\_DzZ

SddssS

ATSC3c

Xch-5dv

NsssCH

NddssS

SaasN

BalabanJ

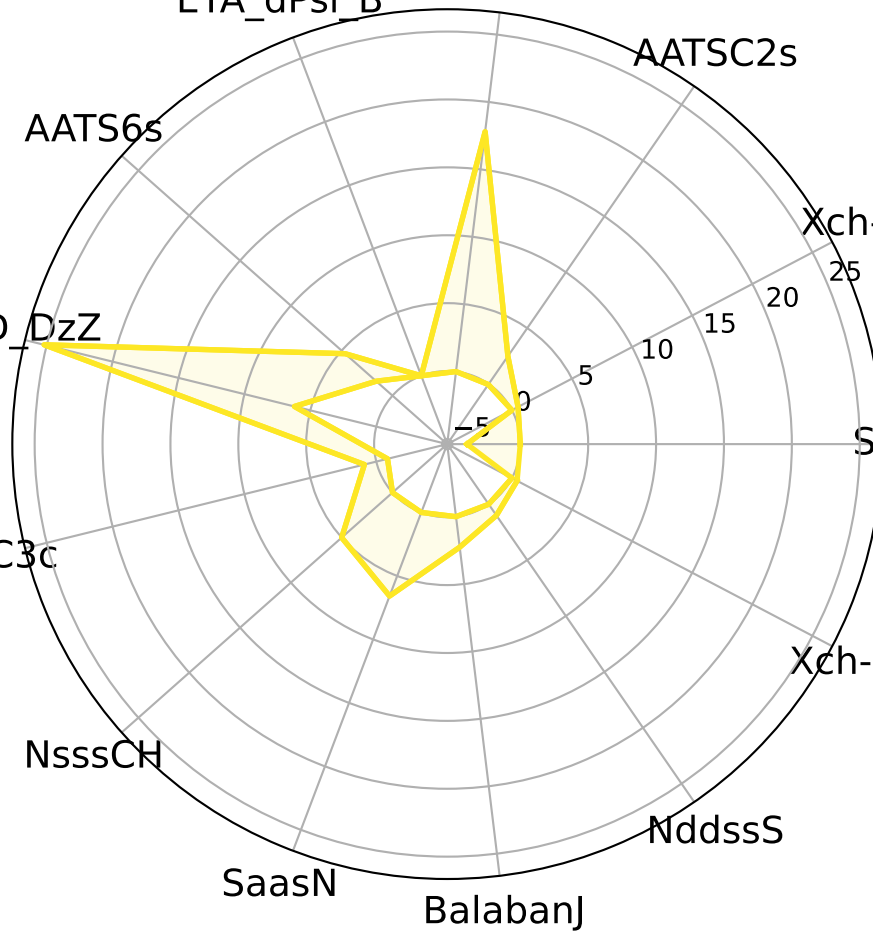

Supplement: s1 [file s1]
