# Supplementary material for: Integrated QSAR Models for Prediction of Serotonergic Activity: Machine Learning Unveiling Activity and Selectivity Patterns of Molecular Descriptors
Source: MDPI journal article supplement (doi:10.3390/pharmaceutics16030349), 2024-03-01
Supplement: s1 [file s1]

Supplementary S5: Value range of the most important descriptors for selectivity model of serotonin receptors based on entire database

| Descriptor | 5-HT1A         | 5-HT1B         | 5-HT1D         | 5-HT2A         | 5-HT2B         | 5-HT2C         |
|------------|----------------|----------------|----------------|----------------|----------------|----------------|
| SddssS     | -8.625 - 0.0   | -3.191 - 0.0   | -5.656 - 0.0   | -4.323 - 0.0   | -3.792 - 0.0   | -4.32 - 0.0    |
| Xch-5d     | 0.0 - 1.659    | 0.0 - 0.341    | 0.0 - 0.415    | 0.0 - 1.093    | 0.0 - 1.023    | 0.0 - 0.463    |
| AATSC2s    | -0.141 - 1.841 | 0.03 - 0.238   | -0.06 - 0.298  | -0.081 - 1.76  | 0.004 - 1.447  | -0.025 - 2.496 |
| MDEC-33    | 0.0 - 27.181   | 2.381 - 14.992 | 1.438 - 13.542 | 0.007 - 17.306 | 1.651 - 15.141 | 0.005 - 14.487 |
| ETA_dPsi_B | 0.0 - 0.037    | 0.0 - 0.0      | 0.0 - 0.0      | 0.0 - 0.0      | 0.0 - 0.0      | 0.0 - 0.0      |
| AATS6s     | 1.455 - 5.987  | 1.941 - 2.949  | 1.936 - 3.226  | 1.772 - 4.991  | 1.927 - 4.059  | 1.325 - 5.256  |
| SpMAD_DzZ  | 3.821 - 21.871 | 5.366 - 11.034 | 5.102 - 12.879 | 4.264 - 16.145 | 5.275 - 12.048 | 4.325 - 13.636 |
| ATSC3c     | -0.53 - 1.57   | -0.248 - 0.329 | -0.332 - 0.363 | -0.657 - 1.153 | -0.949 - 0.28  | -0.597 - 0.768 |
| NsssCH     | 0-19           | 0-3            | 0-4            | 0-6            | 0-5            | 0-9            |
| SaasN      | -0.025 - 6.623 | 0.0 - 4.224    | 0.0 - 2.339    | 0.0 - 4.493    | 0.0 - 2.274    | 0.0 - 4.037    |
| BalabanJ   | 0.0 - 3.251    | 0.925 - 1.876  | 0.0 - 2.077    | 0.0 - 2.601    | 1.013 - 2.06   | 0.0 - 2.12     |
| NddssS     | 0 - 2          | 0 - 1          | 0 - 1          | 0 - 1          | 0 - 1          | 0 - 1          |
| Xch-5dv    | 0.0 - 1.637    | 0.0 - 0.179    | 0.0 - 0.21     | 0.0 - 0.824    | 0.0 - 0.749    | 0.0 - 0.321    |

| Descriptor | 5-HT3          | 5-HT4          | 5-HT5A         | 5-HT6          | 5-HT7          |
|------------|----------------|----------------|----------------|----------------|----------------|
| SddssS     | -3.729 - 0.0   | -7.322 - 0.0   | -3.521 - 0.0   | -11.182 - 0.0  | -3.927 - 0.0   |
| Xch-5d     | 0.0 - 0.332    | 0.0 - 0.856    | 0.0 - 0.585    | 0.0 - 0.437    | 0.0 - 0.51     |
| AATSC2s    | -0.007 - 0.304 | -0.025 - 1.203 | -0.037 - 0.545 | -0.052 - 2.032 | -0.05 - 2.484  |
| MDEC-33    | 0.5 - 25.061   | 0.5 - 17.618   | 0.071 - 20.353 | 0.001 - 18.67  | 0.002 - 17.799 |
| ETA_dPsi_B | 0.0 - 0.0      | 0.0 - 0.0      | 0.0 - 0.0      | 0.0 - 0.0      | 0.0 - 0.0      |
| AATS6s     | 2.137 - 3.108  | 1.726 - 4.37   | 1.78 - 4.447   | 1.204 - 8.658  | 1.604 - 4.661  |
| SpMAD_DzZ  | 5.863 - 10.055 | 6.529 - 32.06  | 3.825 - 10.055 | 4.128 - 19.549 | 6.207 - 25.19  |
| ATSC3c     | -1.137 - 0.5   | -0.88 - 0.423  | -0.881 - 0.644 | -0.932 - 0.726 | -0.855 - 0.899 |
| NsssCH     | 0 - 5          | 0 - 7          | 0 - 2          | 0 - 6          | 0 - 5          |
| SaasN      | 0.0 - 2.406    | 0.0 - 3.084    | 0.0 - 2.501    | 0.0 - 4.42     | 0.0 - 6.585    |
| BalabanJ   | 0.784 - 2.562  | 0.0 - 2.454    | 0.0 - 2.025    | 0.0 - 2.169    | 0.0 - 2.263    |
| NddssS     | 0 - 1          | 0 - 2          | 0 - 1          | 0 - 3          | 0 - 1          |
| Xch-5dv    | 0.0 - 0.153    | 0.0 - 0.812    | 0.0 - 0.448    | 0.0 - 0.311    | 0.0 - 0.433    |
